# Supplementary material
Source: PubMed Central journal article supplement (PMC6796857)
Supplement: 41422_2019_192_MOESM1_ESM.pdf [file 41422_2019_192_MOESM1_ESM.pdf]

## SUPPLEMENTAL INFORMATION

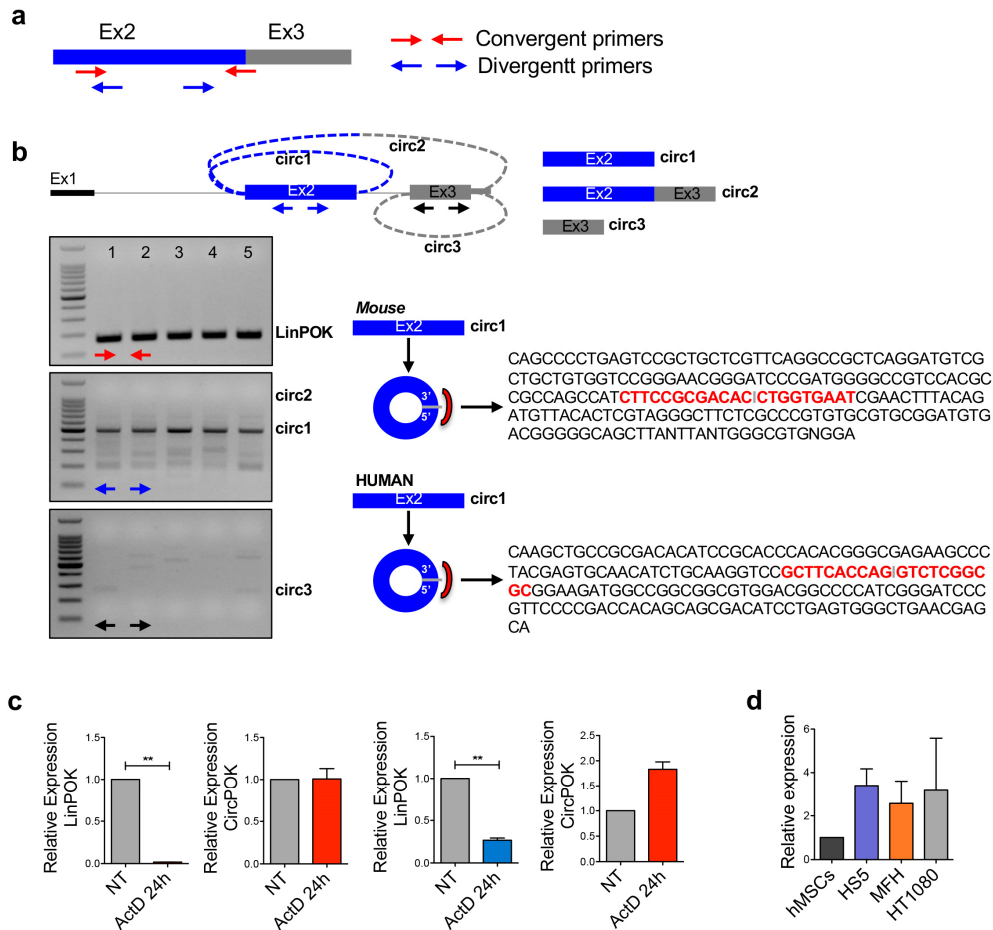

**Figure S1.** CircPOK is a *bona fide* circRNA. **a** Schematic representation of the convergent or divergent primers used to identify LinPOK and circPOK. **b** Schematic representation of the primers on the *Zbtb7a* gene, used to identify potential different isoforms of circPOK. Gels with the resulting PCRs obtained using different primers sets are shown on the left. Sanger sequence analysis of mouse and human circPOK are shown on the right. **c** Expression levels of LinPOK and circPOK in MSCs and HS5 cells treated or untreated (NT) with ActomyosinD for 24 hours. First two charts on the right shown levels of the transcripts in mouse MSCs, while the two charts on the right show the levels of the two transcripts in human HS5 cells. **d** Relative expression levels of circPOK in human primary MSCs or sarcoma cell lines.
