# Supplementary material
Source: PubMed Central journal article supplement (PMC6796857)
Supplement: 41422_2019_192_MOESM2_ESM.pdf [file 41422_2019_192_MOESM2_ESM.pdf]

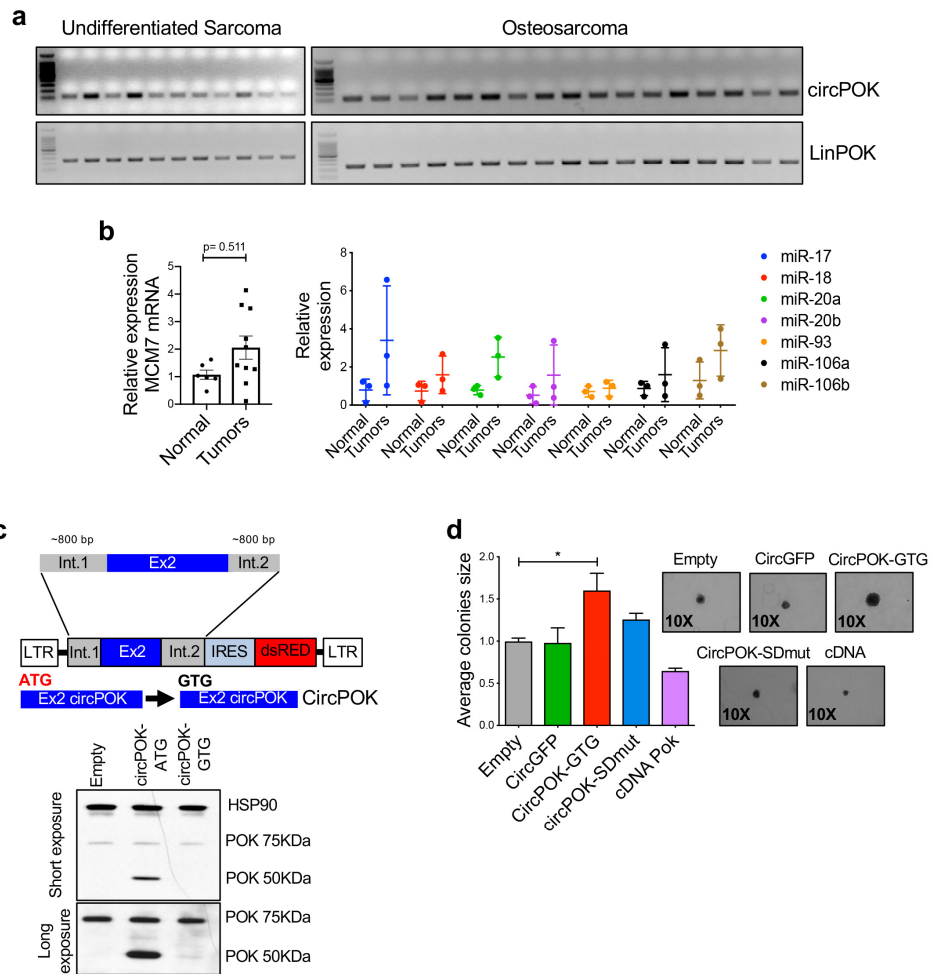

**Figure S2.** The expression of LinPOK and circPOK is decoupled in tumor cells. **a** PCRs to identify circPOK and LinPOK in human primary samples of Undifferentiated Sarcoma (on the left) and Osteosarcoma (on the right). **b** Expression of MCM7 (on the left) and miRNAs (on the right) in human fibrous tissue and undifferentiated sarcoma. **c** Schematic representation of the mutagenesis of the ATG codon in the vector that has been used to express circPOK-GTG. Pokemon-protein expression (POK) upon transduction of the cells with the vectors shown above is reported with the western blot at the bottom of the panel. POK 75KDa is the endogenous protein encoded by the linear transcript. POK 50 KDa is the protein that is derived from the expression vector. **d** Anchorage-independent colony-formation of  $p53^{-/-}Zbtb7a\_Ex2^{F/F-CRE}$  MSCs expressing empty vector, circGFP, circPOK-GTG, circPOK-SDmut and cDNA-POK vectors. Representative colonies in soft agar for each condition analyzed.
