# Supplementary material
Source: PubMed Central journal article supplement (PMC6796857)
Supplement: 41422_2019_192_MOESM3_ESM.pdf [file 41422_2019_192_MOESM3_ESM.pdf]

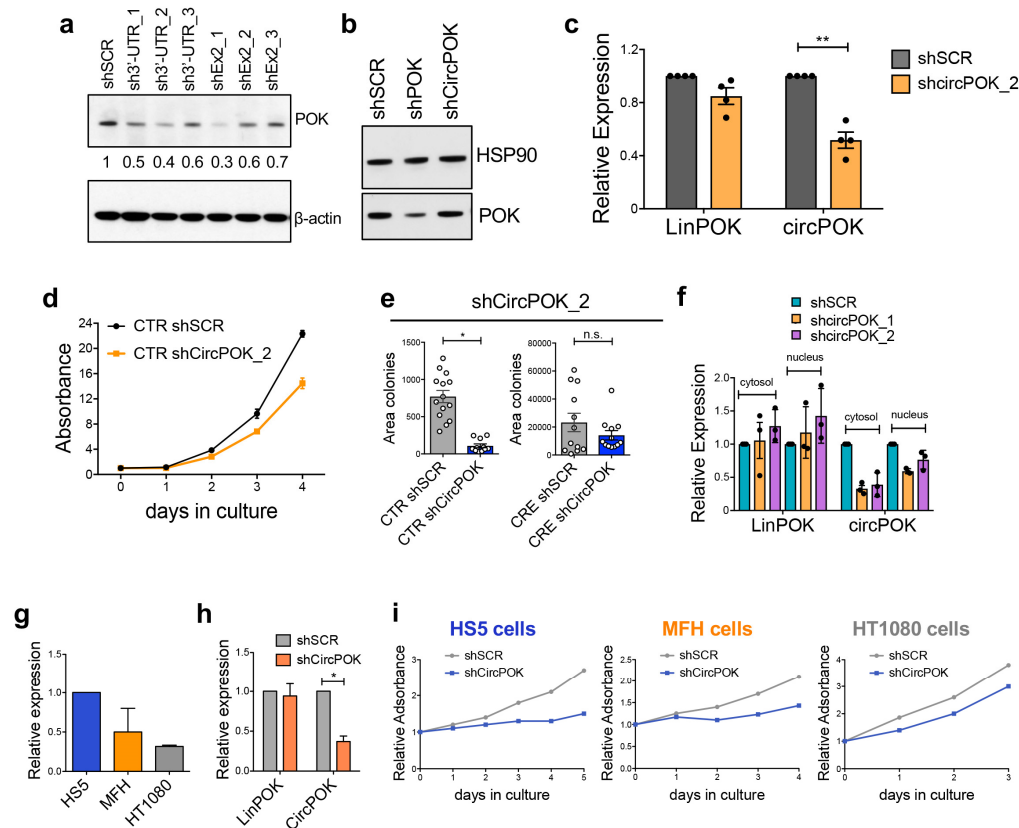

**Figure S3.** Silencing circPOK is beneficial in mesenchymal tumors. **a** Expression levels of Pokemon protein upon its silencing with shRNAs directed at the Exon2 or at the 3'UTR of the linear transcript. **b** Expression levels of Pokemon protein upon the silencing of circPOK through shRNAs directed at the back-splice junction of the circPOK (shCircPOK), or shRNA directed at the exon2 shared by linear and circular transcript. **c** Expression levels of circPOK upon its silencing with an additional shRNA targeting the back-splice junction of circPOK (shCircPOK\_2). **d** Growth curve of  $p53^{-/-}Zbtb7a\_Ex2^{F/F-CTR}$  MSCs transduced with shCircPOK\_2 or with an shRNA or control. **e** Measure of the anchorage-independent proliferation of  $p53^{-/-}Zbtb7a\_Ex2^{F/F-CTR}$  or  $p53^{-/-}Zbtb7a\_Ex2^{F/F-CRE}$  MSCs transduced with shCircPOK\_2 or with an shRNA or control. **f** Expression levels of nuclear and cytosolic CircPOK and LinPOK upon use of shRNAs targeting the back-splice junction of circPOK. **g** Relative expression of circPOK in sarcoma cell lines. **h** Expression levels of LinPOK and circPOK upon knock-down of circPOK by shRNAs in human HS5 cell line. **i** Analysis of the proliferation of the sarcoma cell lines HS5, MFH and HT1080 silenced for the expression of circPOK.
