# Supplementary material
Source: PubMed Central journal article supplement (PMC6796857)
Supplement: 41422_2019_192_MOESM5_ESM.pdf [file 41422_2019_192_MOESM5_ESM.pdf]

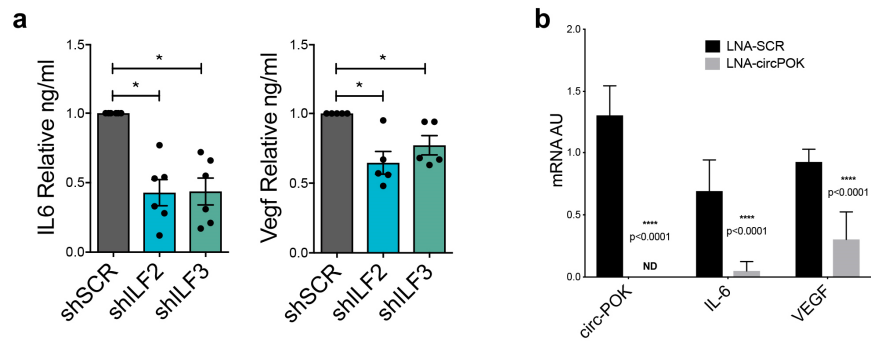

**Figure S5.** ILF2/3 complex regulate the expression of IL6 and VEGF proteins. **a** ELISA assays to detect the expression of IL6 (left), and Vegf (right) in the supernatant of  $p53^{-/-}$   $Zbtb7a\_Ex2^{F/F-CRE}$  MSCs expressing circPOK-GTG upon knock-down of ILF2 or ILF3. **b** RT-qPCR to detect the expression levels of circPOK, IL6 and VEGF upon the use of LNA targeting circPOK.
