# Supplementary material
Source: PubMed Central journal article supplement (PMC6796857)
Supplement: 41422_2019_192_MOESM6_ESM.pdf [file 41422_2019_192_MOESM6_ESM.pdf]

Supplementary Table S1, Primers Table

| Name                | Sequence                                  |
|---------------------|-------------------------------------------|
| Mm_LinPOK_Fw PCR    | CCATCTGCGAGAAGGTGATT                      |
| Mm_LinPOK_Rv PCR    | CACAGGTACGGCTTCTCACC                      |
| Mm_circPOK_Fw       | AAGCTGCCCCGTCACATC                        |
| Mm_circPOK_Rv       | AGAATCTGACGCTCCAGCAG                      |
| Mm_circPOK_Pr1_Fw   | AAGCTGCCCCGTCACATC                        |
| Mm_circPOK_Pr1_Rv   | GGATGTCGCTGCTGTGGTG                       |
| Mm_circPOK_Pr2_Fw   | AGCCCTACGAGTGTAACAT                       |
| Mm_circPOK_Pr2_Rv   | TCAGGATGTCGCTGCTGT                        |
| Hs_LinPOK_Fw        | AAGCCTACGAGTGCAACAT                       |
| Hs_LinPOK_Rv        | GCCGTCTTTCTTGAGGTGTC                      |
| Hs_circPOK_Fw       | ACAAGGGCGTCATGGACTAC                      |
| Hs_circPOK_Rv       | TCGTACACGTTCTGCTGGTC                      |
| Hs_circPOK_junct_Fw | GCTTCACCAGGTCTCGGCT                       |
| Hs_circPOK_junct_Rv | CCTGCGTCCGCTGCTCGTT                       |
| Hs_circPOK_Pr1_Fw   | AACATCTGCAAGGTCCGCTTCA                    |
| Hs_circPOK_Pr1_Rv   | ACTCAGGATGTCGCTGCTGTG                     |
| Hs_circPOK_Pr2_Fw   | ACGAGTGCAACATCTGCAAG                      |
| Hs_circPOK_Pr2_Rv   | GATCACCACGTCGCACAG                        |
| circGFP_Fw          | GTCCTGCTGGAGTTCGTGAC                      |
| circGFP_Rv          | TCCAGCTCGACCAGGATG                        |
| common miRNAs_Rv    | GGCCACGCGTCGACTAGTAC                      |
| miRNA RT PRIMER     | GGCCACGCGTCGACTAGTACTTTTTTTTTTTTTTTTTTTVN |
| Mm_IL6_Fw           | GCAAGAATCCTCGTCCATGT                      |
| Mm_IL6_Rv           | GTGGAGGAGAGGTCGTCTTG                      |
| Mm_VEGF_Fw          | CCTCCGGAAACCATGAACTTT                     |
| Mm_VEGF_Rv          | GGCAGTAGCTTCGCTGGTAG                      |

|                    |                        |
|--------------------|------------------------|
| Mm_IL6promoter_Fw  | CTTGAGCATTGGAGGGGTTA   |
| Mm_IL6promoter_Rv  | GAGGCTTGAAGGTCTGTTGC   |
| Mm_VEGFpromoter_Fw | GGCGGGGTTCTTAGTGCT     |
| Mm_VEGFpromoter_Rv | TTGGCTATGCCTTCTGACACT  |
| Mm_ILF2_Fw         | ATTCGTTTTCTGGCTTTGA    |
| Mm_ILF2_Rv         | ACTGACCCAGGCAAGAACAG   |
| Mm_ILF3_Fw         | GAGCAGGAGAAAGGCAACAG   |
| Mm_ILF3_Rv         | CTTGAGCAGAAGACCCTTGG   |
| Mm_TBP_Fw          | CAATCCAGACTAGCAGCAAGAA |
| Mm_TBP_Rv          | ACTGAACTGCTGGTGGGTCA   |
| GAPDH_Fw           | TGACCACAGTCCATGCCATC   |
| GAPDH_Rv           | GACGGACACATTGGGGGTAG   |
| MCM7_Fw            | CTGGTGTGGCCAAGTCTCA    |
| MCM7_Rv            | CCCCACCCTCTAAGGTCAGT   |
