# Supplementary material
Source: PubMed Central journal article supplement (PMC6796857)
Supplement: 41422_2019_192_MOESM7_ESM.pdf [file 41422_2019_192_MOESM7_ESM.pdf]

Supplementary Table S2, Mass Spectrometry analysis of circPOK binding proteins

| Accession Number | Molecular Weight | CTR1 | pull-down1 | CTR2 | pull-down2 | pull-down3 |
|------------------|------------------|------|------------|------|------------|------------|
| CO6A2_MOUSE      | 110 kDa          | 0    | 1          | 0    | 10         | 16         |
| PRKRA_MOUSE      | 34 kDa           | 0    | 9          | 0    | 12         | 7          |
| DHX30_MOUSE      | 137 kDa          | 0    | 4          | 0    | 11         | 4          |
| HYDIN_MOUSE      | 582 kDa          | 0    | 0          | 0    | 3          | 0          |
| G3BP1_MOUSE      | 52 kDa           | 0    | 4          | 0    | 4          | 3          |
| MARK2_MOUSE      | 86 kDa           | 0    | 4          | 0    | 3          | 1          |
| E9Q6H8_MOUSE     | 144 kDa          | 0    | 1          | 0    | 1          | 2          |
| PURB_MOUSE       | 34 kDa           | 0    | 2          | 0    | 6          | 2          |
| E2AK2_MOUSE      | 58 kDa           | 0    | 3          | 0    | 3          | 1          |
| TRBP2_MOUSE      | 39 kDa           | 0    | 6          | 0    | 4          | 1          |
| DGCR8_MOUSE      | 86 kDa           | 0    | 0          | 0    | 4          | 3          |
| TIM_MOUSE        | 138 kDa          | 0    | 4          | 0    | 0          | 0          |
| G3X9Z4_MOUSE     | 173 kDa          | 0    | 2          | 0    | 2          | 0          |
| SGOL2_MOUSE      | 130 kDa          | 0    | 0          | 0    | 2          | 0          |
| CO2A1_MOUSE      | 142 kDa          | 0    | 0          | 0    | 2          | 5          |
| KC1E_MOUSE       | 47 kDa           | 0    | 1          | 0    | 2          | 1          |
| GSLG1_MOUSE      | 134 kDa          | 0    | 0          | 0    | 3          | 1          |
| RNC_MOUSE        | 159 kDa          | 0    | 0          | 0    | 2          | 0          |
| ZFR_MOUSE        | 117 kDa          | 0    | 3          | 0    | 0          | 0          |
| PURA_MOUSE       | 35 kDa           | 0    | 2          | 0    | 2          | 4          |
| BUD13_MOUSE      | 72 kDa           | 0    | 0          | 0    | 0          | 4          |
| PAXB1_MOUSE      | 105 kDa          | 0    | 1          | 0    | 4          | 0          |
| HNRPL_MOUSE      | 64 kDa           | 0    | 4          | 0    | 0          | 2          |
| ARVC_MOUSE       | 105 kDa          | 0    | 3          | 0    | 0          | 0          |
| RBM34_MOUSE      | 41 kDa           | 0    | 2          | 0    | 1          | 2          |
| RFOX2_MOUSE      | 47 kDa           | 0    | 1          | 0    | 2          | 1          |
| NOB1_MOUSE       | 45 kDa           | 0    | 2          | 0    | 3          | 1          |
| MECP2_MOUSE      | 52 kDa           | 0    | 2          | 0    | 0          | 0          |
| UBP36_MOUSE      | 120 kDa          | 0    | 2          | 0    | 0          | 0          |
| ISY1_MOUSE       | 33 kDa           | 0    | 2          | 0    | 1          | 2          |
| CARF_MOUSE       | 60 kDa           | 0    | 1          | 0    | 2          | 1          |
| BUB3_MOUSE       | 37 kDa           | 0    | 0          | 0    | 2          | 2          |
| RED1_MOUSE       | 78 kDa           | 0    | 2          | 0    | 3          | 0          |
| Q9ER67_MOUSE     | 65 kDa           | 0    | 2          | 0    | 0          | 1          |
| TAF5L_MOUSE      | 66 kDa           | 0    | 0          | 0    | 1          | 2          |
| PKP4_MOUSE       | 132 kDa          | 0    | 0          | 0    | 2          | 0          |
| KHDR1_MOUSE      | 48 kDa           | 0    | 0          | 0    | 0          | 2          |
| SRSF2_MOUSE      | 25 kDa           | 0    | 1          | 0    | 1          | 2          |
| CDCA2_MOUSE      | 106 kDa          | 0    | 2          | 0    | 1          | 1          |
| CD2B2_MOUSE      | 38 kDa           | 0    | 0          | 0    | 1          | 2          |
| HMGB1_MOUSE      | 25 kDa           | 0    | 0          | 0    | 2          | 2          |
| RN214_MOUSE      | 74 kDa           | 0    | 0          | 0    | 2          | 2          |
| M2OM_MOUSE       | 34 kDa           | 0    | 0          | 0    | 3          | 1          |
| XPO2_MOUSE       | 110 kDa          | 0    | 2          | 0    | 1          | 0          |
| TRPS1_MOUSE      | 141 kDa          | 0    | 0          | 0    | 0          | 4          |
| THOC5_MOUSE      | 79 kDa           | 0    | 5          | 0    | 0          | 0          |
| MICA2_MOUSE      | 110 kDa          | 0    | 0          | 0    | 0          | 2          |

|             |         |   |   |   |   |   |
|-------------|---------|---|---|---|---|---|
| RT22_MOUSE  | 41 kDa  | 0 | 2 | 0 | 0 | 0 |
| RPAC2_MOUSE | 15 kDa  | 0 | 2 | 0 | 1 | 0 |
| PDK3_MOUSE  | 48 kDa  | 0 | 1 | 0 | 2 | 0 |
| RCD1_MOUSE  | 34 kDa  | 0 | 0 | 0 | 3 | 1 |
| LARP4_MOUSE | 80 kDa  | 0 | 2 | 0 | 0 | 0 |
| VATA_MOUSE  | 68 kDa  | 0 | 1 | 0 | 0 | 2 |
| ARPC2_MOUSE | 34 kDa  | 0 | 0 | 0 | 2 | 0 |
| KIF1B_MOUSE | 204 kDa | 0 | 0 | 0 | 2 | 0 |
| FEN1_MOUSE  | 42 kDa  | 0 | 0 | 0 | 0 | 2 |
| NSUN5_MOUSE | 51 kDa  | 0 | 0 | 0 | 0 | 2 |
| FA64A_MOUSE | 26 kDa  | 0 | 0 | 0 | 2 | 1 |
| MED22_MOUSE | 22 kDa  | 0 | 0 | 0 | 2 | 1 |
| TBL2_MOUSE  | 50 kDa  | 0 | 0 | 0 | 2 | 1 |
| KI18B_MOUSE | 92 kDa  | 0 | 0 | 0 | 3 | 1 |
| CPSF3_MOUSE | 78 kDa  | 0 | 2 | 0 | 1 | 0 |
| GNL1_MOUSE  | 69 kDa  | 0 | 2 | 0 | 0 | 0 |
| CPSF5_MOUSE | 26 kDa  | 0 | 0 | 0 | 2 | 0 |
| THOC7_MOUSE | 24 kDa  | 0 | 3 | 0 | 0 | 0 |
| RCC2_MOUSE  | 56 kDa  | 0 | 0 | 0 | 3 | 0 |
| CFA20_MOUSE | 23 kDa  | 0 | 0 | 0 | 2 | 0 |
| MLF2_MOUSE  | 28 kDa  | 0 | 2 | 0 | 0 | 0 |
| INT6_MOUSE  | 100 kDa | 0 | 1 | 1 | 2 | 1 |
| ANLN_MOUSE  | 123 kDa | 0 | 0 | 1 | 1 | 5 |
| CCNB1_MOUSE | 48 kDa  | 0 | 0 | 1 | 4 | 2 |
| ATX2_MOUSE  | 136 kDa | 0 | 0 | 1 | 3 | 1 |
| PHLB1_MOUSE | 150 kDa | 0 | 1 | 1 | 2 | 4 |
| PK1IP_MOUSE | 42 kDa  | 0 | 0 | 1 | 2 | 3 |
| NFX1_MOUSE  | 124 kDa | 0 | 0 | 1 | 4 | 4 |
| EMAL1_MOUSE | 90 kDa  | 0 | 0 | 1 | 2 | 2 |
| PHF10_MOUSE | 56 kDa  | 0 | 2 | 1 | 3 | 3 |
| TDIF1_MOUSE | 37 kDa  | 0 | 1 | 1 | 2 | 3 |
| CAV1_MOUSE  | 21 kDa  | 0 | 0 | 1 | 4 | 4 |
| FA76B_MOUSE | 39 kDa  | 0 | 0 | 1 | 5 | 2 |
| NUFP1_MOUSE | 55 kDa  | 0 | 0 | 1 | 3 | 1 |
| NOC4L_MOUSE | 59 kDa  | 0 | 0 | 1 | 3 | 2 |
| INCE_MOUSE  | 101 kDa | 0 | 0 | 1 | 0 | 2 |
| TF3C4_MOUSE | 92 kDa  | 0 | 0 | 1 | 2 | 2 |
| CN166_MOUSE | 28 kDa  | 0 | 0 | 1 | 3 | 3 |
| EMAL4_MOUSE | 110 kDa | 0 | 0 | 1 | 1 | 3 |
| TXTP_MOUSE  | 34 kDa  | 0 | 1 | 1 | 3 | 1 |
| FKB11_MOUSE | 22 kDa  | 0 | 2 | 1 | 2 | 0 |
| SDS3_MOUSE  | 38 kDa  | 0 | 0 | 1 | 4 | 2 |
| CYR61_MOUSE | 42 kDa  | 0 | 0 | 1 | 2 | 0 |
| DDX51_MOUSE | 70 kDa  | 0 | 2 | 1 | 0 | 0 |
| MED19_MOUSE | 26 kDa  | 0 | 1 | 1 | 3 | 2 |
| BRM1L_MOUSE | 38 kDa  | 0 | 1 | 1 | 2 | 2 |
| NSRP1_MOUSE | 64 kDa  | 0 | 0 | 1 | 2 | 0 |
| GRP75_MOUSE | 73 kDa  | 0 | 2 | 1 | 0 | 0 |

|              |         |   |   |   |   |   |
|--------------|---------|---|---|---|---|---|
| GCP2_MOUSE   | 103 kDa | 0 | 1 | 1 | 1 | 2 |
| NAF1_MOUSE   | 53 kDa  | 0 | 0 | 1 | 1 | 2 |
| ROA2_MOUSE   | 37 kDa  | 0 | 1 | 1 | 0 | 2 |
| EXOS5_MOUSE  | 25 kDa  | 0 | 0 | 1 | 2 | 3 |
| PP1A_MOUSE   | 38 kDa  | 0 | 2 | 1 | 0 | 0 |
| ZC3H8_MOUSE  | 35 kDa  | 0 | 0 | 1 | 4 | 0 |
| DIAP3_MOUSE  | 134 kDa | 0 | 0 | 1 | 3 | 0 |
| TIM16_MOUSE  | 14 kDa  | 0 | 1 | 1 | 2 | 0 |
| EXOS1_MOUSE  | 21 kDa  | 0 | 0 | 1 | 1 | 2 |
| CBX8_MOUSE   | 40 kDa  | 0 | 0 | 1 | 0 | 2 |
| MCTS2_MOUSE  | 20 kDa  | 0 | 0 | 1 | 2 | 1 |
| HSP7E_MOUSE  | 55 kDa  | 0 | 0 | 1 | 2 | 1 |
| BRCC3_MOUSE  | 33 kDa  | 0 | 0 | 1 | 3 | 0 |
| Q8BIS1_MOUSE | 53 kDa  | 0 | 0 | 1 | 3 | 0 |
| SNIP1_MOUSE  | 44 kDa  | 0 | 0 | 1 | 0 | 2 |
| TF2H4_MOUSE  | 52 kDa  | 0 | 0 | 1 | 0 | 2 |
| SMC5_MOUSE   | 129 kDa | 0 | 0 | 2 | 6 | 2 |
| CAPR1_MOUSE  | 78 kDa  | 0 | 4 | 2 | 2 | 5 |
| FA76A_MOUSE  | 35 kDa  | 0 | 0 | 2 | 4 | 3 |
| TRIPC_MOUSE  | 224 kDa | 0 | 1 | 2 | 3 | 2 |
| DDX46_MOUSE  | 117 kDa | 0 | 0 | 2 | 5 | 5 |
| EP300_MOUSE  | 263 kDa | 0 | 0 | 2 | 1 | 5 |
| SOGA1_MOUSE  | 159 kDa | 0 | 0 | 2 | 4 | 3 |
| CNDG2_MOUSE  | 131 kDa | 0 | 0 | 2 | 5 | 4 |
| LARP1_MOUSE  | 121 kDa | 0 | 1 | 2 | 4 | 2 |
| UTP18_MOUSE  | 61 kDa  | 0 | 5 | 2 | 2 | 2 |
| HMGB2_MOUSE  | 24 kDa  | 0 | 1 | 2 | 2 | 3 |
| KANK2_MOUSE  | 90 kDa  | 0 | 1 | 2 | 5 | 2 |
| AHDC1_MOUSE  | 168 kDa | 0 | 0 | 2 | 6 | 2 |
| SLIT2_MOUSE  | 169 kDa | 0 | 0 | 2 | 2 | 1 |
| PDIP3_MOUSE  | 46 kDa  | 0 | 0 | 2 | 2 | 1 |
| G5E8B9_MOUSE | 119 kDa | 0 | 2 | 2 | 0 | 1 |
| SF3A3_MOUSE  | 59 kDa  | 0 | 2 | 2 | 1 | 2 |
| EHMT2_MOUSE  | 138 kDa | 0 | 2 | 2 | 0 | 0 |
| FXR1_MOUSE   | 76 kDa  | 0 | 1 | 2 | 2 | 2 |
| ADNP_MOUSE   | 124 kDa | 0 | 1 | 2 | 0 | 1 |
| MTAP2_MOUSE  | 199 kDa | 0 | 0 | 2 | 1 | 0 |
| KAT7_MOUSE   | 71 kDa  | 0 | 0 | 2 | 1 | 1 |
| RFC4_MOUSE   | 40 kDa  | 0 | 1 | 2 | 2 | 3 |
| AP2A_MOUSE   | 48 kDa  | 0 | 0 | 2 | 4 | 2 |
| ZC3H4_MOUSE  | 141 kDa | 0 | 0 | 2 | 3 | 2 |
| ASXL2_MOUSE  | 147 kDa | 0 | 0 | 2 | 1 | 0 |
| TPX2_MOUSE   | 86 kDa  | 0 | 0 | 2 | 1 | 1 |
| PHF19_MOUSE  | 65 kDa  | 0 | 0 | 2 | 2 | 2 |
| ARPC4_MOUSE  | 20 kDa  | 0 | 0 | 2 | 2 | 3 |
| ARP3_MOUSE   | 47 kDa  | 0 | 0 | 2 | 4 | 0 |
| AKP8L_MOUSE  | 71 kDa  | 0 | 0 | 2 | 1 | 2 |
| SMRD1_MOUSE  | 58 kDa  | 0 | 0 | 2 | 2 | 1 |

|                 |         |   |   |   |    |   |
|-----------------|---------|---|---|---|----|---|
| CBP_MOUSE       | 265 kDa | 0 | 0 | 2 | 1  | 4 |
| BAZ1A_MOUSE     | 178 kDa | 0 | 0 | 2 | 0  | 1 |
| ANM5_MOUSE      | 73 kDa  | 0 | 0 | 2 | 0  | 0 |
| RPA43_MOUSE     | 37 kDa  | 0 | 0 | 2 | 1  | 2 |
| RFC2_MOUSE      | 39 kDa  | 0 | 0 | 2 | 1  | 2 |
| FLNB_MOUSE      | 278 kDa | 0 | 3 | 2 | 0  | 0 |
| SELB_MOUSE      | 64 kDa  | 0 | 1 | 2 | 0  | 0 |
| CG050_MOUSE     | 22 kDa  | 0 | 0 | 2 | 2  | 1 |
| CNDH2_MOUSE     | 69 kDa  | 0 | 0 | 2 | 1  | 2 |
| CSK22_MOUSE     | 41 kDa  | 0 | 0 | 2 | 1  | 0 |
| TF3C2_MOUSE     | 100 kDa | 0 | 0 | 2 | 0  | 0 |
| TMA16_MOUSE     | 26 kDa  | 0 | 1 | 2 | 1  | 0 |
| SRRT_MOUSE      | 100 kDa | 0 | 0 | 2 | 1  | 0 |
| G3BP2_MOUSE     | 54 kDa  | 0 | 6 | 3 | 11 | 7 |
| CO3A1_MOUSE     | 139 kDa | 0 | 4 | 3 | 4  | 4 |
| RING2_MOUSE     | 38 kDa  | 0 | 0 | 3 | 8  | 6 |
| TUT7_MOUSE      | 169 kDa | 0 | 0 | 3 | 2  | 1 |
| LBR_MOUSE       | 71 kDa  | 0 | 2 | 3 | 3  | 1 |
| AFAD_MOUSE      | 207 kDa | 0 | 3 | 3 | 3  | 3 |
| AKAP8_MOUSE     | 76 kDa  | 0 | 3 | 3 | 2  | 2 |
| SIN3B_MOUSE     | 126 kDa | 0 | 1 | 3 | 3  | 2 |
| CYTA_MOUSE      | 124 kDa | 0 | 1 | 3 | 0  | 0 |
| BAP1_MOUSE      | 80 kDa  | 0 | 0 | 3 | 3  | 3 |
| CKP2L_MOUSE     | 83 kDa  | 0 | 1 | 3 | 4  | 1 |
| E9Q7E2_MOUSE    | 196 kDa | 0 | 0 | 3 | 0  | 1 |
| UBP2L_MOUSE     | 117 kDa | 0 | 0 | 3 | 4  | 2 |
| NRDE2_MOUSE     | 133 kDa | 0 | 1 | 3 | 3  | 0 |
| MICU1_MOUSE     | 54 kDa  | 0 | 1 | 3 | 1  | 5 |
| ZN281_MOUSE     | 97 kDa  | 0 | 0 | 3 | 4  | 2 |
| NUFP2_MOUSE     | 76 kDa  | 0 | 0 | 3 | 3  | 2 |
| MED27_MOUSE     | 35 kDa  | 0 | 0 | 3 | 3  | 1 |
| ZCCHV_MOUSE     | 107 kDa | 0 | 0 | 3 | 2  | 2 |
| RU2B_MOUSE      | 25 kDa  | 0 | 0 | 3 | 1  | 3 |
| RUXE_MOUSE      | 11 kDa  | 0 | 0 | 3 | 2  | 1 |
| TECR_MOUSE      | 36 kDa  | 0 | 0 | 3 | 1  | 3 |
| AFAP1_MOUSE     | 81 kDa  | 0 | 0 | 3 | 3  | 0 |
| DECR_MOUSE      | 36 kDa  | 0 | 0 | 3 | 2  | 0 |
| DNLI3_MOUSE     | 113 kDa | 0 | 0 | 3 | 0  | 0 |
| SAM50_MOUSE     | 52 kDa  | 0 | 0 | 3 | 1  | 1 |
| TBG1_MOUSE (+1) | 51 kDa  | 0 | 1 | 3 | 1  | 0 |
| PRD10_MOUSE     | 134 kDa | 0 | 0 | 3 | 0  | 2 |
| E9Q8X5_MOUSE    | 94 kDa  | 0 | 0 | 3 | 0  | 2 |
| RBM27_MOUSE     | 119 kDa | 0 | 0 | 4 | 5  | 4 |
| RAD50_MOUSE     | 153 kDa | 0 | 0 | 4 | 6  | 3 |
| EED_MOUSE       | 50 kDa  | 0 | 0 | 4 | 9  | 4 |
| LMF2_MOUSE      | 80 kDa  | 0 | 0 | 4 | 5  | 6 |
| HDGR2_MOUSE     | 74 kDa  | 0 | 2 | 4 | 3  | 4 |
| KIF2C_MOUSE     | 81 kDa  | 0 | 1 | 4 | 4  | 4 |

|              |         |   |    |    |    |    |
|--------------|---------|---|----|----|----|----|
| Q3TMP1_MOUSE | 101 kDa | 0 | 0  | 4  | 3  | 6  |
| ING1_MOUSE   | 32 kDa  | 0 | 0  | 4  | 2  | 4  |
| SF3A1_MOUSE  | 89 kDa  | 0 | 2  | 4  | 3  | 1  |
| PP1RA_MOUSE  | 94 kDa  | 0 | 1  | 4  | 3  | 2  |
| P3C2A_MOUSE  | 191 kDa | 0 | 0  | 4  | 2  | 1  |
| MED6_MOUSE   | 28 kDa  | 0 | 0  | 4  | 3  | 1  |
| MICU2_MOUSE  | 49 kDa  | 0 | 0  | 4  | 2  | 0  |
| P66A_MOUSE   | 67 kDa  | 0 | 2  | 5  | 3  | 4  |
| ATX2L_MOUSE  | 111 kDa | 0 | 1  | 5  | 5  | 5  |
| WAPL_MOUSE   | 134 kDa | 0 | 1  | 5  | 5  | 4  |
| E9Q2I4_MOUSE | 120 kDa | 0 | 0  | 5  | 4  | 6  |
| NFIX_MOUSE   | 53 kDa  | 0 | 1  | 5  | 5  | 2  |
| SYCC_MOUSE   | 95 kDa  | 0 | 1  | 5  | 4  | 2  |
| SMRD2_MOUSE  | 59 kDa  | 0 | 4  | 5  | 2  | 0  |
| NFIC_MOUSE   | 49 kDa  | 0 | 0  | 5  | 3  | 3  |
| RFC1_MOUSE   | 126 kDa | 0 | 2  | 6  | 5  | 5  |
| RGAP1_MOUSE  | 70 kDa  | 0 | 4  | 6  | 4  | 4  |
| MED12_MOUSE  | 245 kDa | 0 | 0  | 6  | 2  | 5  |
| SUZ12_MOUSE  | 83 kDa  | 0 | 0  | 6  | 5  | 4  |
| ZO2_MOUSE    | 131 kDa | 0 | 0  | 6  | 6  | 6  |
| YBOX3_MOUSE  | 39 kDa  | 0 | 25 | 7  | 39 | 29 |
| EZH2_MOUSE   | 85 kDa  | 0 | 0  | 7  | 7  | 3  |
| COIA1_MOUSE  | 182 kDa | 0 | 1  | 7  | 4  | 5  |
| ZBT7A_MOUSE  | 60 kDa  | 0 | 0  | 7  | 4  | 3  |
| CHD9_MOUSE   | 324 kDa | 0 | 0  | 8  | 6  | 6  |
| RBM28_MOUSE  | 84 kDa  | 0 | 0  | 8  | 6  | 5  |
| DDX17_MOUSE  | 72 kDa  | 0 | 5  | 8  | 8  | 7  |
| BRD3_MOUSE   | 80 kDa  | 0 | 1  | 8  | 5  | 2  |
| NONO_MOUSE   | 55 kDa  | 0 | 2  | 10 | 7  | 6  |
| E9Q4N7_MOUSE | 238 kDa | 0 | 0  | 11 | 1  | 3  |
| UBF1_MOUSE   | 90 kDa  | 0 | 0  | 12 | 5  | 8  |
| LUZP1_MOUSE  | 119 kDa | 0 | 0  | 13 | 27 | 26 |
| DOC11_MOUSE  | 238 kDa | 0 | 1  | 13 | 20 | 23 |
| GPTC8_MOUSE  | 165 kDa | 0 | 3  | 13 | 8  | 14 |
| CHD1_MOUSE   | 196 kDa | 0 | 0  | 17 | 11 | 4  |
| BRD4_MOUSE   | 156 kDa | 0 | 0  | 20 | 13 | 11 |
| PRC2A_MOUSE  | 229 kDa | 0 | 2  | 35 | 34 | 42 |
| ACTS_MOUSE   | 42 kDa  | 0 | 55 | 63 | 69 | 0  |
| COCA1_MOUSE  | 340 kDa | 1 | 3  | 0  | 3  | 4  |
| NIPBL_MOUSE  | 315 kDa | 1 | 5  | 0  | 4  | 2  |
| UT14A_MOUSE  | 87 kDa  | 1 | 3  | 0  | 1  | 1  |
| SRRM1_MOUSE  | 107 kDa | 1 | 2  | 0  | 0  | 0  |
| J3QNY1_MOUSE | 37 kDa  | 1 | 2  | 0  | 1  | 1  |
| RFC5_MOUSE   | 38 kDa  | 1 | 2  | 0  | 2  | 5  |
| PHF6_MOUSE   | 41 kDa  | 1 | 4  | 0  | 1  | 1  |
| ROA1_MOUSE   | 34 kDa  | 1 | 3  | 0  | 2  | 2  |
| YTHD2_MOUSE  | 62 kDa  | 1 | 1  | 0  | 2  | 3  |
| TF3C5_MOUSE  | 61 kDa  | 1 | 0  | 0  | 0  | 2  |

|                    |         |   |   |   |   |   |
|--------------------|---------|---|---|---|---|---|
| AT2A2_MOUSE        | 115 kDa | 1 | 5 | 0 | 0 | 0 |
| RCL1_MOUSE         | 41 kDa  | 1 | 1 | 0 | 1 | 2 |
| CETN2_MOUSE        | 20 kDa  | 1 | 1 | 0 | 2 | 1 |
| ZN771_MOUSE        | 36 kDa  | 1 | 1 | 0 | 2 | 0 |
| PHF5A_MOUSE        | 12 kDa  | 1 | 0 | 0 | 3 | 3 |
| NOL12_MOUSE        | 25 kDa  | 1 | 3 | 0 | 2 | 0 |
| PO121_MOUSE        | 121 kDa | 1 | 1 | 0 | 2 | 1 |
| TRAM1_MOUSE        | 43 kDa  | 1 | 2 | 0 | 1 | 2 |
| MO4L2_MOUSE        | 32 kDa  | 1 | 1 | 0 | 2 | 1 |
| SEC63_MOUSE        | 88 kDa  | 1 | 2 | 0 | 1 | 0 |
| SSBP_MOUSE         | 17 kDa  | 1 | 0 | 0 | 2 | 2 |
| AKIP_MOUSE         | 23 kDa  | 1 | 2 | 0 | 1 | 0 |
| GFPT1_MOUSE        | 79 kDa  | 1 | 2 | 0 | 0 | 0 |
| AT131_MOUSE        | 132 kDa | 1 | 2 | 0 | 0 | 0 |
| RALY_MOUSE         | 33 kDa  | 1 | 3 | 0 | 0 | 0 |
| AFG32_MOUSE        | 90 kDa  | 1 | 2 | 0 | 1 | 0 |
| NGDN_MOUSE         | 36 kDa  | 1 | 1 | 0 | 1 | 2 |
| NIP7_MOUSE         | 20 kDa  | 1 | 0 | 0 | 3 | 1 |
| RM48_MOUSE         | 24 kDa  | 1 | 2 | 0 | 0 | 0 |
| A0A140T8V5_MOUSE ? |         | 1 | 3 | 0 | 0 | 0 |
| KPYM_MOUSE         | 58 kDa  | 1 | 2 | 0 | 0 | 0 |
| SAMH1_MOUSE        | 73 kDa  | 1 | 2 | 0 | 0 | 0 |
| TAP26_MOUSE        | 28 kDa  | 1 | 2 | 0 | 0 | 0 |
| GANP_MOUSE         | 217 kDa | 1 | 2 | 0 | 1 | 0 |
| KNOP1_MOUSE        | 54 kDa  | 1 | 2 | 0 | 0 | 0 |
| CALU_MOUSE         | 37 kDa  | 1 | 2 | 0 | 0 | 0 |
| DCA13_MOUSE        | 51 kDa  | 1 | 0 | 0 | 2 | 0 |
| ZN593_MOUSE        | 15 kDa  | 1 | 2 | 0 | 0 | 0 |
| EIF2A_MOUSE        | 64 kDa  | 1 | 1 | 1 | 7 | 5 |
| CNOT1_MOUSE        | 267 kDa | 1 | 0 | 1 | 5 | 4 |
| C19L2_MOUSE        | 103 kDa | 1 | 2 | 1 | 3 | 1 |
| RU2A_MOUSE         | 28 kDa  | 1 | 5 | 1 | 3 | 2 |
| E9Q035_MOUSE       | 108 kDa | 1 | 1 | 1 | 4 | 5 |
| REQU_MOUSE         | 44 kDa  | 1 | 3 | 1 | 4 | 3 |
| KRR1_MOUSE         | 44 kDa  | 1 | 0 | 1 | 3 | 4 |
| SPT2_MOUSE         | 75 kDa  | 1 | 4 | 1 | 1 | 1 |
| IQEC1_MOUSE        | 108 kDa | 1 | 1 | 1 | 1 | 2 |
| RFC3_MOUSE         | 41 kDa  | 1 | 1 | 1 | 3 | 2 |
| TAOK1_MOUSE        | 116 kDa | 1 | 0 | 1 | 2 | 0 |
| FA98A_MOUSE        | 55 kDa  | 1 | 2 | 1 | 3 | 2 |
| SRP14_MOUSE        | 13 kDa  | 1 | 2 | 1 | 4 | 2 |
| RPOM_MOUSE         | 137 kDa | 1 | 2 | 1 | 0 | 0 |
| KLDC4_MOUSE        | 65 kDa  | 1 | 0 | 1 | 2 | 4 |
| CEBPZ_MOUSE        | 120 kDa | 1 | 2 | 1 | 0 | 0 |
| WIZ_MOUSE          | 184 kDa | 1 | 0 | 1 | 2 | 3 |
| SFXN1_MOUSE        | 36 kDa  | 1 | 2 | 1 | 0 | 1 |
| GTSE1_MOUSE        | 79 kDa  | 1 | 0 | 1 | 1 | 2 |
| NOP10_MOUSE        | 8 kDa   | 1 | 4 | 1 | 1 | 1 |

|             |         |   |   |   |    |    |
|-------------|---------|---|---|---|----|----|
| TTC17_MOUSE | 136 kDa | 1 | 1 | 1 | 2  | 1  |
| FL2D_MOUSE  | 44 kDa  | 1 | 3 | 1 | 1  | 1  |
| DDX41_MOUSE | 70 kDa  | 1 | 0 | 1 | 1  | 2  |
| IF1AX_MOUSE | 16 kDa  | 1 | 0 | 1 | 3  | 3  |
| BRE_MOUSE   | 44 kDa  | 1 | 1 | 1 | 2  | 2  |
| CSK2B_MOUSE | 25 kDa  | 1 | 0 | 1 | 0  | 2  |
| AT1A1_MOUSE | 113 kDa | 1 | 2 | 1 | 0  | 0  |
| SKP1_MOUSE  | 19 kDa  | 1 | 0 | 1 | 1  | 2  |
| TRA2A_MOUSE | 32 kDa  | 1 | 2 | 1 | 0  | 0  |
| ANKL2_MOUSE | 106 kDa | 1 | 0 | 2 | 12 | 9  |
| CO6A1_MOUSE | 108 kDa | 1 | 1 | 2 | 10 | 12 |
| PI4KA_MOUSE | ?       | 1 | 1 | 2 | 7  | 4  |
| GKAP1_MOUSE | 42 kDa  | 1 | 2 | 2 | 9  | 6  |
| RAD21_MOUSE | 72 kDa  | 1 | 0 | 2 | 4  | 7  |
| BD1L1_MOUSE | 327 kDa | 1 | 0 | 2 | 1  | 1  |
| TCP4_MOUSE  | 14 kDa  | 1 | 1 | 2 | 4  | 4  |
| SCAF8_MOUSE | 140 kDa | 1 | 1 | 2 | 1  | 2  |
| CX056_MOUSE | 26 kDa  | 1 | 1 | 2 | 3  | 4  |
| LIPB1_MOUSE | 109 kDa | 1 | 1 | 2 | 3  | 4  |
| DAXX_MOUSE  | 81 kDa  | 1 | 2 | 2 | 3  | 2  |
| SR140_MOUSE | 118 kDa | 1 | 0 | 2 | 1  | 1  |
| K1211_MOUSE | 132 kDa | 1 | 1 | 2 | 1  | 0  |
| ST5_MOUSE   | 127 kDa | 1 | 1 | 2 | 1  | 0  |
| PRP4_MOUSE  | 58 kDa  | 1 | 1 | 2 | 4  | 0  |
| AP2S1_MOUSE | 17 kDa  | 1 | 1 | 2 | 2  | 2  |
| S30BP_MOUSE | 34 kDa  | 1 | 1 | 2 | 3  | 1  |
| EWS_MOUSE   | 68 kDa  | 1 | 0 | 2 | 1  | 2  |
| PLCD3_MOUSE | 89 kDa  | 1 | 0 | 2 | 3  | 1  |
| RED_MOUSE   | 66 kDa  | 1 | 1 | 2 | 2  | 0  |
| ELP1_MOUSE  | 150 kDa | 1 | 1 | 2 | 0  | 0  |
| KIF14_MOUSE | 186 kDa | 1 | 1 | 3 | 8  | 6  |
| PRDBP_MOUSE | 28 kDa  | 1 | 3 | 3 | 10 | 6  |
| MAGT1_MOUSE | 38 kDa  | 1 | 4 | 3 | 1  | 1  |
| AFG31_MOUSE | 87 kDa  | 1 | 1 | 3 | 2  | 3  |
| EXOS2_MOUSE | 33 kDa  | 1 | 2 | 3 | 4  | 1  |
| DNJC2_MOUSE | 72 kDa  | 1 | 0 | 3 | 2  | 5  |
| PSIP1_MOUSE | 60 kDa  | 1 | 3 | 3 | 2  | 0  |
| COL12_MOUSE | 81 kDa  | 1 | 1 | 3 | 1  | 3  |
| EXOS3_MOUSE | 30 kDa  | 1 | 2 | 3 | 2  | 2  |
| MOV10_MOUSE | 114 kDa | 1 | 0 | 3 | 4  | 3  |
| PRC2B_MOUSE | 161 kDa | 1 | 1 | 3 | 3  | 2  |
| ABCD3_MOUSE | 75 kDa  | 1 | 0 | 3 | 2  | 2  |
| ARP2_MOUSE  | 45 kDa  | 1 | 0 | 3 | 4  | 0  |
| RIOK1_MOUSE | 65 kDa  | 1 | 0 | 3 | 3  | 2  |
| RU17_MOUSE  | 52 kDa  | 1 | 1 | 3 | 1  | 3  |
| P5CS_MOUSE  | 87 kDa  | 1 | 1 | 3 | 2  | 1  |
| IF6_MOUSE   | 27 kDa  | 1 | 2 | 3 | 2  | 2  |
| SNF5_MOUSE  | 44 kDa  | 1 | 1 | 3 | 2  | 0  |

|                   |               |          |           |          |           |          |
|-------------------|---------------|----------|-----------|----------|-----------|----------|
| BRD7_MOUSE        | 74 kDa        | 1        | 0         | 3        | 0         | 0        |
| MYPT1_MOUSE       | 115 kDa       | 1        | 1         | 4        | 4         | 8        |
| TIF1B_MOUSE       | 89 kDa        | 1        | 3         | 4        | 5         | 3        |
| SMCE1_MOUSE       | 47 kDa        | 1        | 3         | 4        | 7         | 7        |
| FMNL3_MOUSE       | 117 kDa       | 1        | 2         | 4        | 5         | 4        |
| F120A_MOUSE       | 122 kDa       | 1        | 0         | 4        | 6         | 6        |
| MYO5A_MOUSE       | 216 kDa       | 1        | 0         | 4        | 3         | 1        |
| MTA1_MOUSE        | 81 kDa        | 1        | 4         | 4        | 5         | 2        |
| BACD3_MOUSE       | 36 kDa        | 1        | 2         | 4        | 4         | 1        |
| ZN609_MOUSE       | 151 kDa       | 1        | 1         | 4        | 3         | 0        |
| TCRG1_MOUSE       | 124 kDa       | 1        | 3         | 4        | 2         | 0        |
| NAA35_MOUSE       | 83 kDa        | 1        | 1         | 4        | 0         | 1        |
| SEPT5_MOUSE       | 43 kDa        | 1        | 0         | 4        | 1         | 2        |
| DHX36_MOUSE       | 114 kDa       | 1        | 9         | 5        | 11        | 4        |
| ELOA1_MOUSE       | 87 kDa        | 1        | 0         | 5        | 5         | 7        |
| HMGA1_MOUSE       | 12 kDa        | 1        | 1         | 5        | 6         | 6        |
| UBP16_MOUSE       | 93 kDa        | 1        | 6         | 5        | 2         | 2        |
| IF2B1_MOUSE       | 63 kDa        | 1        | 3         | 5        | 5         | 1        |
| NOP9_MOUSE        | 70 kDa        | 1        | 1         | 5        | 5         | 3        |
| MYO1D_MOUSE       | 116 kDa       | 1        | 2         | 5        | 1         | 1        |
| LACTB_MOUSE       | 61 kDa        | 1        | 1         | 5        | 2         | 0        |
| MED17_MOUSE       | 72 kDa        | 1        | 2         | 5        | 3         | 1        |
| PCOC1_MOUSE       | 50 kDa        | 1        | 3         | 6        | 14        | 7        |
| DDX1_MOUSE        | 83 kDa        | 1        | 2         | 6        | 9         | 7        |
| RB6I2_MOUSE       | 128 kDa       | 1        | 1         | 6        | 2         | 2        |
| GEMI2_MOUSE       | 30 kDa        | 1        | 2         | 6        | 6         | 3        |
| SRPRA_MOUSE       | ?             | 1        | 1         | 7        | 10        | 7        |
| HELLS_MOUSE       | 95 kDa        | 1        | 3         | 7        | 9         | 4        |
| MURC_MOUSE        | 41 kDa        | 1        | 2         | 7        | 11        | 4        |
| RBM14_MOUSE       | 69 kDa        | 1        | 3         | 7        | 3         | 2        |
| SP130_MOUSE       | 111 kDa       | 1        | 2         | 7        | 2         | 4        |
| BMP2K_MOUSE       | 126 kDa       | 1        | 3         | 9        | 12        | 8        |
| CE170_MOUSE       | 175 kDa       | 1        | 4         | 9        | 10        | 7        |
| EPN4_MOUSE        | 69 kDa        | 1        | 1         | 9        | 6         | 8        |
| KIF23_MOUSE       | 109 kDa       | 1        | 1         | 10       | 8         | 7        |
| SFPQ_MOUSE        | 75 kDa        | 1        | 0         | 11       | 14        | 14       |
| ARI1A_MOUSE       | 242 kDa       | 1        | 4         | 11       | 6         | 2        |
| CCNK_MOUSE        | 61 kDa        | 1        | 1         | 12       | 14        | 7        |
| CO5A2_MOUSE       | 145 kDa       | 1        | 8         | 12       | 10        | 10       |
| TOP3B_MOUSE       | 97 kDa        | 1        | 1         | 13       | 12        | 16       |
| OTUD4_MOUSE       | 123 kDa       | 1        | 1         | 13       | 9         | 9        |
| MTMR5_MOUSE       | 209 kDa       | 1        | 1         | 14       | 15        | 9        |
| TDRD3_MOUSE       | 82 kDa        | 1        | 1         | 17       | 18        | 14       |
| PARP1_MOUSE       | 113 kDa       | 1        | 1         | 22       | 10        | 8        |
| SP16H_MOUSE       | 120 kDa       | 1        | 1         | 49       | 45        | 39       |
| <b>ILF3_MOUSE</b> | <b>96 kDa</b> | <b>2</b> | <b>19</b> | <b>0</b> | <b>22</b> | <b>9</b> |
| <b>ILF2_MOUSE</b> | <b>43 kDa</b> | <b>2</b> | <b>7</b>  | <b>0</b> | <b>13</b> | <b>7</b> |
| PRR11_MOUSE       | 41 kDa        | 2        | 4         | 0        | 1         | 5        |



|               |         |   |   |   |   |   |
|---------------|---------|---|---|---|---|---|
| RL37_MOUSE    | 11 kDa  | 2 | 2 | 0 | 0 | 0 |
| XPO1_MOUSE    | 123 kDa | 2 | 3 | 0 | 0 | 0 |
| BORG5_MOUSE   | 43 kDa  | 2 | 4 | 0 | 2 | 2 |
| SNW1_MOUSE    | 61 kDa  | 2 | 3 | 0 | 0 | 1 |
| SENP3_MOUSE   | 64 kDa  | 2 | 4 | 0 | 0 | 0 |
| RABL6_MOUSE   | 80 kDa  | 2 | 5 | 0 | 0 | 0 |
| HEAT3_MOUSE   | 74 kDa  | 2 | 1 | 0 | 0 | 0 |
| LOXL2_MOUSE   | 87 kDa  | 2 | 5 | 0 | 0 | 0 |
| BAG1_MOUSE    | 40 kDa  | 2 | 1 | 0 | 2 | 1 |
| RM15_MOUSE    | 34 kDa  | 2 | 3 | 0 | 2 | 0 |
| GLYR1_MOUSE   | 60 kDa  | 2 | 3 | 0 | 1 | 0 |
| PRP17_MOUSE   | 65 kDa  | 2 | 3 | 0 | 1 | 0 |
| RSU1_MOUSE    | 32 kDa  | 2 | 1 | 0 | 0 | 0 |
| THOC1_MOUSE   | 75 kDa  | 2 | 6 | 0 | 0 | 0 |
| TRIO_MOUSE    | 348 kDa | 2 | 0 | 0 | 0 | 0 |
| MAGD1_MOUSE   | 86 kDa  | 2 | 2 | 0 | 1 | 0 |
| SRP09_MOUSE   | 10 kDa  | 2 | 3 | 0 | 2 | 0 |
| P4HA2_MOUSE   | 61 kDa  | 2 | 3 | 0 | 0 | 0 |
| SQRD_MOUSE    | 50 kDa  | 2 | 2 | 0 | 1 | 0 |
| HNRPQ_MOUSE   | 70 kDa  | 2 | 0 | 0 | 2 | 1 |
| D3Z0K6_MOUSE  | 92 kDa  | 2 | 1 | 0 | 0 | 0 |
| OSBL3_MOUSE   | 97 kDa  | 2 | 4 | 0 | 0 | 0 |
| PPIE_MOUSE    | 33 kDa  | 2 | 3 | 0 | 0 | 0 |
| BOREA_MOUSE   | 32 kDa  | 2 | 4 | 0 | 0 | 0 |
| CAMP1_MOUSE   | 176 kDa | 2 | 0 | 0 | 0 | 0 |
| NUSAP_MOUSE   | 49 kDa  | 2 | 3 | 0 | 0 | 1 |
| K1C16_MOUSE   | 52 kDa  | 2 | 0 | 0 | 9 | 3 |
| CAPZB_MOUSE   | 31 kDa  | 2 | 2 | 0 | 0 | 0 |
| SDA1_MOUSE    | 80 kDa  | 2 | 0 | 0 | 0 | 0 |
| SSRA_MOUSE    | 32 kDa  | 2 | 2 | 0 | 0 | 1 |
| CRNL1_MOUSE   | 83 kDa  | 2 | 1 | 0 | 1 | 0 |
| ZFA_MOUSE(+1) | 85 kDa  | 2 | 1 | 0 | 0 | 0 |
| THOC3_MOUSE   | 39 kDa  | 2 | 3 | 0 | 0 | 0 |
| BOP1_MOUSE    | 83 kDa  | 2 | 2 | 0 | 0 | 0 |
| ARMX3_MOUSE   | 43 kDa  | 2 | 1 | 0 | 0 | 0 |
| SSRD_MOUSE    | 19 kDa  | 2 | 0 | 0 | 1 | 1 |
| IF4B_MOUSE    | 69 kDa  | 2 | 1 | 0 | 0 | 1 |
| FHOD1_MOUSE   | 130 kDa | 2 | 1 | 0 | 0 | 0 |
| THOC6_MOUSE   | 37 kDa  | 2 | 2 | 0 | 0 | 0 |
| NOL9_MOUSE    | 81 kDa  | 2 | 2 | 0 | 0 | 0 |
| NSA2_MOUSE    | 30 kDa  | 2 | 2 | 0 | 0 | 0 |
| WDR12_MOUSE   | 47 kDa  | 2 | 2 | 0 | 0 | 0 |
| UIMC1_MOUSE   | 81 kDa  | 2 | 0 | 0 | 0 | 1 |
| MYO1E_MOUSE   | 127 kDa | 2 | 0 | 0 | 0 | 0 |
| KPCI_MOUSE    | 68 kDa  | 2 | 0 | 0 | 0 | 0 |
| PCBP2_MOUSE   | 38 kDa  | 2 | 3 | 0 | 0 | 0 |
| RCN2_MOUSE    | 37 kDa  | 2 | 0 | 0 | 0 | 0 |
| PRS7_MOUSE    | 49 kDa  | 2 | 0 | 0 | 0 | 0 |

|              |         |   |    |   |    |    |
|--------------|---------|---|----|---|----|----|
| CCD12_MOUSE  | 19 kDa  | 2 | 0  | 0 | 0  | 0  |
| WDR83_MOUSE  | 34 kDa  | 2 | 0  | 0 | 0  | 0  |
| PCH2_MOUSE   | 48 kDa  | 2 | 0  | 0 | 0  | 0  |
| ATP5L_MOUSE  | 11 kDa  | 2 | 0  | 0 | 0  | 0  |
| CI114_MOUSE  | 43 kDa  | 2 | 0  | 0 | 0  | 0  |
| K22O_MOUSE   | 63 kDa  | 2 | 2  | 1 | 7  | 6  |
| NACAM_MOUSE  | 220 kDa | 2 | 3  | 1 | 4  | 1  |
| EXOC2_MOUSE  | 104 kDa | 2 | 1  | 1 | 2  | 3  |
| DLGP5_MOUSE  | 90 kDa  | 2 | 2  | 1 | 3  | 2  |
| CLAP2_MOUSE  | 141 kDa | 2 | 2  | 1 | 3  | 2  |
| ZCH18_MOUSE  | 106 kDa | 2 | 1  | 1 | 2  | 3  |
| BRI3B_MOUSE  | 28 kDa  | 2 | 2  | 1 | 1  | 3  |
| UTP23_MOUSE  | 28 kDa  | 2 | 6  | 1 | 2  | 0  |
| SMD3_MOUSE   | 14 kDa  | 2 | 2  | 1 | 3  | 2  |
| SCMC1_MOUSE  | 53 kDa  | 2 | 4  | 1 | 1  | 0  |
| DDX24_MOUSE  | 96 kDa  | 2 | 1  | 1 | 2  | 1  |
| PDIA1_MOUSE  | 57 kDa  | 2 | 1  | 1 | 1  | 2  |
| RRP15_MOUSE  | 31 kDa  | 2 | 1  | 1 | 0  | 1  |
| EXOS6_MOUSE  | 28 kDa  | 2 | 3  | 1 | 1  | 0  |
| F193A_MOUSE  | 137 kDa | 2 | 2  | 1 | 1  | 0  |
| EXOS7_MOUSE  | 32 kDa  | 2 | 1  | 1 | 1  | 1  |
| RPF1_MOUSE   | 40 kDa  | 2 | 0  | 1 | 0  | 0  |
| MCM4_MOUSE   | 97 kDa  | 2 | 0  | 1 | 0  | 0  |
| WDR5_MOUSE   | 37 kDa  | 2 | 1  | 1 | 0  | 0  |
| VIGLN_MOUSE  | 142 kDa | 2 | 18 | 2 | 12 | 4  |
| PGAM5_MOUSE  | 32 kDa  | 2 | 8  | 2 | 10 | 13 |
| DNJA1_MOUSE  | 45 kDa  | 2 | 3  | 2 | 6  | 5  |
| EIF3F_MOUSE  | 38 kDa  | 2 | 3  | 2 | 3  | 5  |
| FBRL_MOUSE   | 34 kDa  | 2 | 1  | 2 | 3  | 2  |
| PHB2_MOUSE   | 33 kDa  | 2 | 0  | 2 | 1  | 3  |
| Q8VCG1_MOUSE | 21 kDa  | 2 | 2  | 2 | 1  | 1  |
| SMD1_MOUSE   | 13 kDa  | 2 | 2  | 2 | 3  | 3  |
| CMC2_MOUSE   | 74 kDa  | 2 | 2  | 2 | 2  | 0  |
| RFA1_MOUSE   | 69 kDa  | 2 | 2  | 2 | 1  | 0  |
| AROS_MOUSE   | 16 kDa  | 2 | 1  | 2 | 2  | 1  |
| DNJA2_MOUSE  | 46 kDa  | 2 | 3  | 3 | 7  | 3  |
| Q0VBL3_MOUSE | 106 kDa | 2 | 2  | 3 | 4  | 7  |
| E9PZM7_MOUSE | 162 kDa | 2 | 4  | 3 | 2  | 6  |
| RTCB_MOUSE   | 55 kDa  | 2 | 0  | 3 | 4  | 4  |
| MBD3_MOUSE   | 32 kDa  | 2 | 2  | 3 | 4  | 1  |
| Q9CZN7_MOUSE | 56 kDa  | 2 | 1  | 3 | 1  | 5  |
| F175A_MOUSE  | 46 kDa  | 2 | 1  | 3 | 3  | 4  |
| NAA16_MOUSE  | 101 kDa | 2 | 0  | 3 | 0  | 1  |
| HNRL2_MOUSE  | 85 kDa  | 2 | 8  | 4 | 2  | 1  |
| DDX10_MOUSE  | 101 kDa | 2 | 5  | 4 | 1  | 2  |
| FIP1_MOUSE   | 65 kDa  | 2 | 3  | 4 | 4  | 2  |
| FACR1_MOUSE  | 59 kDa  | 2 | 3  | 4 | 0  | 5  |
| MED8_MOUSE   | 29 kDa  | 2 | 1  | 4 | 3  | 1  |

|                   |          |   |    |    |    |    |
|-------------------|----------|---|----|----|----|----|
| EF1B_MOUSE        | 25 kDa   | 2 | 2  | 4  | 2  | 3  |
| EXOS9_MOUSE       | 49 kDa   | 2 | 2  | 4  | 3  | 0  |
| TF3C1_MOUSE       | 237 kDa  | 2 | 2  | 5  | 5  | 4  |
| LA_MOUSE          | 48 kDa   | 2 | 14 | 6  | 25 | 15 |
| SF3B6_MOUSE       | 15 kDa   | 2 | 1  | 6  | 8  | 6  |
| PB1_MOUSE         | 187 kDa  | 2 | 5  | 6  | 4  | 1  |
| PCM1_MOUSE        | 229 kDa  | 2 | 3  | 6  | 1  | 1  |
| MED14_MOUSE       | 161 kDa  | 2 | 3  | 7  | 4  | 5  |
| NOP14_MOUSE       | 99 kDa   | 2 | 3  | 9  | 9  | 10 |
| PHLB2_MOUSE       | 141 kDa  | 2 | 1  | 10 | 7  | 7  |
| BRD2_MOUSE        | 88 kDa   | 2 | 2  | 10 | 8  | 4  |
| TOP1_MOUSE        | 91 kDa   | 2 | 4  | 13 | 4  | 9  |
| PRC2C_MOUSE       | 311 kDa  | 2 | 1  | 28 | 40 | 28 |
| SMHD1_MOUSE       | 226 kDa  | 2 | 7  | 32 | 54 | 40 |
| DHX9_MOUSE        | 149 kDa  | 3 | 40 | 0  | 7  | 0  |
| SYNE1_MOUSE       | 1010 kDa | 3 | 2  | 0  | 0  | 0  |
| RL34_MOUSE        | 13 kDa   | 3 | 4  | 0  | 2  | 1  |
| RL18A_MOUSE       | 21 kDa   | 3 | 0  | 0  | 6  | 2  |
| CENPE_MOUSE       | 287 kDa  | 3 | 0  | 0  | 0  | 1  |
| ZN638_MOUSE       | 218 kDa  | 3 | 0  | 0  | 2  | 0  |
| RL18_MOUSE        | 22 kDa   | 3 | 6  | 0  | 2  | 2  |
| RL35A_MOUSE       | 13 kDa   | 3 | 2  | 0  | 3  | 3  |
| GCN1_MOUSE        | ?        | 3 | 3  | 0  | 2  | 1  |
| PPIL1_MOUSE       | 18 kDa   | 3 | 2  | 0  | 4  | 0  |
| DYL1_MOUSE        | 10 kDa   | 3 | 1  | 0  | 3  | 2  |
| RS20_MOUSE        | 13 kDa   | 3 | 6  | 0  | 0  | 0  |
| MSH2_MOUSE        | 104 kDa  | 3 | 4  | 0  | 1  | 0  |
| 1433G_MOUSE       | 28 kDa   | 3 | 4  | 0  | 1  | 0  |
| NH2L1_MOUSE       | 14 kDa   | 3 | 3  | 0  | 1  | 1  |
| E9Q2Z4_MOUSE (+1) | 9 kDa    | 3 | 1  | 0  | 1  | 0  |
| REXO4_MOUSE       | 48 kDa   | 3 | 3  | 0  | 1  | 0  |
| ARF4_MOUSE        | 20 kDa   | 3 | 3  | 0  | 0  | 0  |
| RBM22_MOUSE       | 47 kDa   | 3 | 2  | 0  | 0  | 0  |
| 1433Z_MOUSE       | 28 kDa   | 3 | 3  | 0  | 0  | 0  |
| PFKAM_MOUSE       | 85 kDa   | 3 | 3  | 0  | 0  | 0  |
| ERH_MOUSE         | 12 kDa   | 3 | 2  | 0  | 0  | 0  |
| CCD86_MOUSE       | 46 kDa   | 3 | 2  | 0  | 0  | 0  |
| RSSA_MOUSE        | 33 kDa   | 3 | 1  | 0  | 0  | 0  |
| TRA2B_MOUSE       | 34 kDa   | 3 | 0  | 0  | 1  | 0  |
| EIF3I_MOUSE       | 36 kDa   | 3 | 3  | 1  | 1  | 5  |
| PCBP1_MOUSE       | 37 kDa   | 3 | 3  | 1  | 2  | 2  |
| NHP2_MOUSE        | 17 kDa   | 3 | 4  | 1  | 4  | 2  |
| SF3B4_MOUSE       | 44 kDa   | 3 | 2  | 1  | 4  | 2  |
| LUC7L_MOUSE       | 44 kDa   | 3 | 0  | 1  | 2  | 1  |
| DEK_MOUSE         | 43 kDa   | 3 | 1  | 1  | 0  | 3  |
| SURF6_MOUSE       | 41 kDa   | 3 | 3  | 1  | 0  | 0  |
| ELP3_MOUSE        | 62 kDa   | 3 | 1  | 1  | 1  | 1  |
| MYEF2_MOUSE       | 63 kDa   | 3 | 3  | 1  | 2  | 0  |

|              |         |   |    |    |    |    |
|--------------|---------|---|----|----|----|----|
| NOL7_MOUSE   | 29 kDa  | 3 | 3  | 1  | 1  | 1  |
| ZNF22_MOUSE  | 27 kDa  | 3 | 1  | 1  | 1  | 1  |
| EIF3K_MOUSE  | 25 kDa  | 3 | 2  | 1  | 1  | 1  |
| RUVB2_MOUSE  | 51 kDa  | 3 | 7  | 2  | 0  | 2  |
| NEST_MOUSE   | 207 kDa | 3 | 1  | 2  | 1  | 2  |
| E9Q0F0_MOUSE | 112 kDa | 3 | 5  | 2  | 4  | 5  |
| NOM1_MOUSE   | 96 kDa  | 3 | 1  | 2  | 2  | 2  |
| Q3ULL6_MOUSE | 57 kDa  | 3 | 2  | 2  | 4  | 2  |
| EXOS8_MOUSE  | 30 kDa  | 3 | 2  | 2  | 2  | 1  |
| MED13_MOUSE  | 239 kDa | 3 | 0  | 2  | 1  | 1  |
| ATPK_MOUSE   | 10 kDa  | 3 | 1  | 2  | 0  | 1  |
| SGPL1_MOUSE  | 64 kDa  | 3 | 4  | 3  | 7  | 6  |
| MINA_MOUSE   | 54 kDa  | 3 | 4  | 3  | 2  | 2  |
| WBP11_MOUSE  | 70 kDa  | 3 | 4  | 3  | 1  | 1  |
| TOP2B_MOUSE  | 182 kDa | 3 | 2  | 3  | 4  | 4  |
| PPIB_MOUSE   | 24 kDa  | 3 | 1  | 3  | 8  | 4  |
| GNL3L_MOUSE  | 65 kDa  | 3 | 0  | 3  | 1  | 2  |
| EIF3M_MOUSE  | 43 kDa  | 3 | 1  | 3  | 1  | 2  |
| CMC1_MOUSE   | 75 kDa  | 3 | 2  | 3  | 2  | 1  |
| PAIRB_MOUSE  | 45 kDa  | 3 | 3  | 4  | 5  | 12 |
| WDR33_MOUSE  | 145 kDa | 3 | 7  | 4  | 1  | 4  |
| INT1_MOUSE   | 245 kDa | 3 | 3  | 4  | 6  | 6  |
| MRCKB_MOUSE  | 195 kDa | 3 | 1  | 4  | 3  | 3  |
| SYTC2_MOUSE  | 91 kDa  | 3 | 5  | 4  | 3  | 1  |
| RUVB1_MOUSE  | 50 kDa  | 3 | 4  | 4  | 2  | 5  |
| RPB1_MOUSE   | 217 kDa | 3 | 5  | 4  | 1  | 0  |
| TFP11_MOUSE  | 96 kDa  | 3 | 1  | 4  | 1  | 1  |
| STAU1_MOUSE  | 54 kDa  | 3 | 12 | 5  | 19 | 15 |
| CD11B_MOUSE  | 92 kDa  | 3 | 2  | 5  | 4  | 5  |
| MED4_MOUSE   | 30 kDa  | 3 | 3  | 5  | 0  | 1  |
| PXK_MOUSE    | 65 kDa  | 3 | 3  | 6  | 9  | 6  |
| KIF2A_MOUSE  | 80 kDa  | 3 | 4  | 6  | 6  | 7  |
| RSBN1_MOUSE  | 89 kDa  | 3 | 4  | 6  | 10 | 5  |
| ARH40_MOUSE  | 165 kDa | 3 | 4  | 7  | 3  | 2  |
| EXOC3_MOUSE  | 86 kDa  | 3 | 3  | 7  | 4  | 6  |
| P66B_MOUSE   | 65 kDa  | 3 | 9  | 8  | 8  | 9  |
| CNDD3_MOUSE  | 169 kDa | 3 | 1  | 10 | 11 | 8  |
| SEPT9_MOUSE  | 66 kDa  | 3 | 1  | 12 | 1  | 3  |
| ATAD3_MOUSE  | 67 kDa  | 3 | 6  | 21 | 14 | 15 |
| CHD8_MOUSE   | 291 kDa | 3 | 2  | 31 | 23 | 26 |
| SSRP1_MOUSE  | 81 kDa  | 3 | 1  | 34 | 29 | 23 |
| PCNT_MOUSE   | 329 kDa | 4 | 3  | 0  | 0  | 2  |
| DYHC1_MOUSE  | 532 kDa | 4 | 2  | 0  | 0  | 0  |
| UBR5_MOUSE   | 308 kDa | 4 | 2  | 0  | 1  | 0  |
| SUCA_MOUSE   | 36 kDa  | 4 | 7  | 0  | 1  | 0  |
| AQR_MOUSE    | 170 kDa | 4 | 5  | 0  | 1  | 1  |
| MPCP_MOUSE   | 40 kDa  | 4 | 3  | 0  | 1  | 3  |
| DDX52_MOUSE  | 67 kDa  | 4 | 5  | 0  | 0  | 0  |

|              |         |   |   |    |    |    |
|--------------|---------|---|---|----|----|----|
| MPP10_MOUSE  | 79 kDa  | 4 | 3 | 0  | 1  | 0  |
| UIF_MOUSE    | 36 kDa  | 4 | 4 | 0  | 0  | 0  |
| RIOK2_MOUSE  | 62 kDa  | 4 | 4 | 0  | 0  | 0  |
| ERI1_MOUSE   | 39 kDa  | 4 | 4 | 0  | 1  | 0  |
| ZC21A_MOUSE  | 35 kDa  | 4 | 3 | 0  | 1  | 0  |
| BCLF1_MOUSE  | 106 kDa | 4 | 5 | 0  | 0  | 0  |
| RS5_MOUSE    | 23 kDa  | 4 | 3 | 0  | 0  | 0  |
| NO66_MOUSE   | 68 kDa  | 4 | 2 | 0  | 0  | 0  |
| RM46_MOUSE   | 32 kDa  | 4 | 3 | 0  | 0  | 0  |
| RL14_MOUSE   | 24 kDa  | 4 | 2 | 0  | 2  | 1  |
| RHG31_MOUSE  | 155 kDa | 4 | 1 | 0  | 2  | 0  |
| RL38_MOUSE   | 8 kDa   | 4 | 3 | 0  | 1  | 0  |
| RPP38_MOUSE  | 31 kDa  | 4 | 3 | 0  | 0  | 0  |
| MCCB_MOUSE   | 61 kDa  | 4 | 2 | 0  | 0  | 0  |
| CATB_MOUSE   | 37 kDa  | 4 | 1 | 0  | 0  | 0  |
| RUXF_MOUSE   | 10 kDa  | 4 | 4 | 1  | 5  | 7  |
| SND1_MOUSE   | 102 kDa | 4 | 7 | 1  | 3  | 0  |
| HMGA2_MOUSE  | 12 kDa  | 4 | 4 | 1  | 3  | 2  |
| YMEL1_MOUSE  | 80 kDa  | 4 | 1 | 1  | 1  | 1  |
| CPSF4_MOUSE  | 24 kDa  | 4 | 3 | 1  | 2  | 2  |
| RL12_MOUSE   | 18 kDa  | 4 | 1 | 1  | 4  | 0  |
| AIFM1_MOUSE  | 67 kDa  | 4 | 3 | 1  | 0  | 2  |
| SERPH_MOUSE  | 47 kDa  | 4 | 1 | 1  | 0  | 1  |
| SERA_MOUSE   | 57 kDa  | 4 | 2 | 1  | 0  | 0  |
| MYO9B_MOUSE  | 239 kDa | 4 | 2 | 2  | 2  | 4  |
| KC1A_MOUSE   | 39 kDa  | 4 | 7 | 2  | 5  | 4  |
| EIF3L_MOUSE  | 67 kDa  | 4 | 3 | 2  | 4  | 6  |
| DDX31_MOUSE  | 77 kDa  | 4 | 4 | 2  | 2  | 0  |
| MRCKA_MOUSE  | 196 kDa | 4 | 1 | 2  | 1  | 2  |
| STT3B_MOUSE  | 93 kDa  | 4 | 5 | 3  | 3  | 11 |
| FLII_MOUSE   | 145 kDa | 4 | 8 | 3  | 1  | 3  |
| CPSF1_MOUSE  | 161 kDa | 4 | 2 | 3  | 2  | 2  |
| TM214_MOUSE  | 76 kDa  | 4 | 4 | 3  | 3  | 5  |
| CPSF2_MOUSE  | 88 kDa  | 4 | 1 | 3  | 2  | 1  |
| EF1G_MOUSE   | 50 kDa  | 4 | 4 | 4  | 9  | 10 |
| SMD2_MOUSE   | 14 kDa  | 4 | 5 | 4  | 3  | 4  |
| SMN_MOUSE    | 31 kDa  | 4 | 2 | 4  | 4  | 5  |
| SEP10_MOUSE  | 52 kDa  | 4 | 0 | 4  | 2  | 1  |
| A2AT37_MOUSE | 148 kDa | 4 | 6 | 5  | 7  | 5  |
| WDR46_MOUSE  | 69 kDa  | 4 | 3 | 5  | 3  | 3  |
| IF2P_MOUSE   | 138 kDa | 4 | 2 | 6  | 3  | 5  |
| DHB12_MOUSE  | 35 kDa  | 4 | 5 | 7  | 12 | 8  |
| SYTC_MOUSE   | 83 kDa  | 4 | 4 | 7  | 3  | 2  |
| Q6PGF5_MOUSE | 145 kDa | 4 | 2 | 8  | 7  | 8  |
| TMOD3_MOUSE  | 40 kDa  | 4 | 9 | 8  | 3  | 2  |
| TCOF_MOUSE   | 135 kDa | 4 | 4 | 9  | 5  | 8  |
| KIFC1_MOUSE  | 74 kDa  | 4 | 4 | 10 | 6  | 2  |
| SMC3_MOUSE   | 142 kDa | 4 | 3 | 12 | 26 | 31 |

|                    |         |   |    |    |    |    |
|--------------------|---------|---|----|----|----|----|
| CDK12_MOUSE        | 164 kDa | 4 | 4  | 12 | 13 | 10 |
| HDAC2_MOUSE        | 55 kDa  | 4 | 7  | 13 | 4  | 7  |
| ZO1_MOUSE          | 195 kDa | 4 | 5  | 15 | 13 | 11 |
| DNMT1_MOUSE        | 183 kDa | 4 | 6  | 29 | 29 | 20 |
| E9QA22_MOUSE (+1)  | 24 kDa  | 5 | 5  | 0  | 7  | 2  |
| PFKAL_MOUSE        | 85 kDa  | 5 | 3  | 0  | 0  | 1  |
| A0A140T8K6_MOUSE ? |         | 5 | 5  | 0  | 0  | 2  |
| VIR_MOUSE          | 201 kDa | 5 | 4  | 0  | 0  | 0  |
| RRP7A_MOUSE        | 32 kDa  | 5 | 6  | 0  | 0  | 0  |
| RS19_MOUSE         | 16 kDa  | 5 | 1  | 0  | 1  | 1  |
| TCPZ_MOUSE         | 58 kDa  | 5 | 1  | 0  | 2  | 0  |
| RRP1_MOUSE         | 55 kDa  | 5 | 4  | 0  | 0  | 1  |
| RS10_MOUSE         | 19 kDa  | 5 | 3  | 0  | 0  | 0  |
| CAN2_MOUSE         | 80 kDa  | 5 | 2  | 0  | 0  | 0  |
| ATPO_MOUSE         | 23 kDa  | 5 | 3  | 0  | 0  | 0  |
| RM40_MOUSE         | 24 kDa  | 5 | 2  | 0  | 0  | 0  |
| RS27L_MOUSE        | 9 kDa   | 5 | 8  | 0  | 7  | 5  |
| RIF1_MOUSE         | 266 kDa | 5 | 9  | 1  | 0  | 1  |
| SYF1_MOUSE         | 100 kDa | 5 | 5  | 1  | 0  | 1  |
| H10_MOUSE          | 21 kDa  | 5 | 6  | 1  | 1  | 1  |
| ECHB_MOUSE         | 51 kDa  | 5 | 4  | 1  | 0  | 1  |
| RL10A_MOUSE        | 25 kDa  | 5 | 8  | 2  | 7  | 5  |
| LYOX_MOUSE         | 47 kDa  | 5 | 6  | 2  | 2  | 3  |
| SPF27_MOUSE        | 26 kDa  | 5 | 8  | 3  | 3  | 3  |
| SYNC_MOUSE         | 64 kDa  | 5 | 8  | 3  | 1  | 2  |
| RSMN_MOUSE         | 25 kDa  | 5 | 4  | 3  | 2  | 3  |
| CND2_MOUSE         | 82 kDa  | 5 | 11 | 4  | 2  | 4  |
| ARF_MOUSE          | 19 kDa  | 5 | 1  | 4  | 7  | 6  |
| DNJB6_MOUSE        | 40 kDa  | 5 | 7  | 4  | 5  | 3  |
| BAG2_MOUSE         | 23 kDa  | 5 | 3  | 4  | 3  | 4  |
| K1C14_MOUSE        | 53 kDa  | 5 | 4  | 4  | 9  | 5  |
| PESC_MOUSE         | 68 kDa  | 5 | 2  | 4  | 2  | 3  |
| K1C17_MOUSE        | 48 kDa  | 5 | 5  | 4  | 11 | 5  |
| SAFB2_MOUSE        | 112 kDa | 5 | 4  | 4  | 7  | 8  |
| RMXL1_MOUSE        | 42 kDa  | 5 | 6  | 5  | 8  | 6  |
| CO1A2_MOUSE        | 130 kDa | 5 | 6  | 6  | 7  | 7  |
| SPAT5_MOUSE        | 97 kDa  | 5 | 6  | 7  | 5  | 8  |
| SSF1_MOUSE         | 53 kDa  | 5 | 7  | 7  | 4  | 2  |
| TGM2_MOUSE         | 77 kDa  | 5 | 7  | 7  | 4  | 6  |
| SMC1A_MOUSE        | 143 kDa | 5 | 6  | 8  | 20 | 26 |
| E9PVX6_MOUSE       | 351 kDa | 5 | 9  | 9  | 6  | 2  |
| CC124_MOUSE        | 25 kDa  | 5 | 8  | 10 | 15 | 9  |
| SPAS2_MOUSE        | 59 kDa  | 5 | 9  | 13 | 16 | 14 |
| SF3B3_MOUSE        | 136 kDa | 5 | 1  | 13 | 15 | 13 |
| SIN3A_MOUSE        | 145 kDa | 5 | 2  | 18 | 9  | 11 |
| TR150_MOUSE        | 108 kDa | 6 | 8  | 0  | 0  | 0  |
| PININ_MOUSE        | 82 kDa  | 6 | 5  | 0  | 1  | 1  |
| RRP5_MOUSE         | 208 kDa | 6 | 3  | 0  | 0  | 0  |

|                   |         |   |    |    |    |    |
|-------------------|---------|---|----|----|----|----|
| COPB_MOUSE        | 107 kDa | 6 | 8  | 0  | 0  | 1  |
| Q91VA7_MOUSE      | 42 kDa  | 6 | 7  | 0  | 0  | 0  |
| RPF2_MOUSE        | 35 kDa  | 6 | 3  | 0  | 2  | 3  |
| PYC_MOUSE         | 130 kDa | 6 | 2  | 0  | 0  | 0  |
| ATPG_MOUSE        | 33 kDa  | 6 | 3  | 0  | 2  | 1  |
| DRG2_MOUSE        | 41 kDa  | 6 | 6  | 0  | 0  | 1  |
| MCM5_MOUSE        | 82 kDa  | 6 | 4  | 0  | 0  | 0  |
| PCCB_MOUSE        | 58 kDa  | 6 | 0  | 0  | 0  | 0  |
| PCCA_MOUSE        | 80 kDa  | 6 | 0  | 0  | 0  | 0  |
| RL13A_MOUSE       | 23 kDa  | 6 | 5  | 1  | 7  | 2  |
| BRX1_MOUSE        | 41 kDa  | 6 | 5  | 1  | 6  | 2  |
| DNJC9_MOUSE       | 30 kDa  | 6 | 11 | 1  | 2  | 4  |
| RL30_MOUSE        | 13 kDa  | 6 | 4  | 1  | 5  | 3  |
| LAS1L_MOUSE       | 89 kDa  | 6 | 9  | 1  | 0  | 0  |
| EIF3H_MOUSE       | 40 kDa  | 6 | 6  | 1  | 3  | 2  |
| HEX11_MOUSE       | 40 kDa  | 6 | 2  | 1  | 2  | 3  |
| DDX56_MOUSE       | 61 kDa  | 6 | 3  | 1  | 2  | 0  |
| Q91V89_MOUSE      | 69 kDa  | 6 | 3  | 1  | 1  | 2  |
| RS27_MOUSE        | 9 kDa   | 6 | 9  | 2  | 6  | 4  |
| SAP18_MOUSE       | 18 kDa  | 6 | 5  | 2  | 2  | 3  |
| TCPA_MOUSE        | 60 kDa  | 6 | 7  | 2  | 0  | 2  |
| UBP7_MOUSE        | 128 kDa | 6 | 0  | 3  | 8  | 6  |
| ESYT2_MOUSE       | 94 kDa  | 6 | 5  | 3  | 3  | 3  |
| E9PYL9_MOUSE (+1) | 20 kDa  | 6 | 6  | 3  | 1  | 1  |
| K2C1_MOUSE        | 66 kDa  | 6 | 5  | 3  | 7  | 5  |
| SPF45_MOUSE       | 45 kDa  | 6 | 7  | 4  | 10 | 5  |
| MATR3_MOUSE       | 95 kDa  | 6 | 7  | 4  | 2  | 4  |
| NVL_MOUSE         | 94 kDa  | 6 | 6  | 4  | 2  | 3  |
| HMMR_MOUSE        | 92 kDa  | 6 | 5  | 4  | 1  | 1  |
| K2C79_MOUSE       | 58 kDa  | 6 | 5  | 4  | 7  | 6  |
| NOG2_MOUSE        | 83 kDa  | 6 | 11 | 5  | 2  | 2  |
| HNRH1_MOUSE       | 49 kDa  | 6 | 5  | 5  | 6  | 4  |
| RBBP7_MOUSE       | 48 kDa  | 6 | 5  | 5  | 6  | 5  |
| SRP68_MOUSE       | 71 kDa  | 6 | 6  | 6  | 8  | 4  |
| Q9CQ73_MOUSE      | 88 kDa  | 6 | 5  | 6  | 8  | 5  |
| D3Z5M2_MOUSE (+1) | 68 kDa  | 6 | 7  | 6  | 6  | 3  |
| DDX47_MOUSE       | 51 kDa  | 6 | 10 | 7  | 12 | 7  |
| ESPL1_MOUSE       | 233 kDa | 6 | 4  | 7  | 5  | 6  |
| SEPT2_MOUSE       | 42 kDa  | 6 | 2  | 7  | 8  | 6  |
| GELS_MOUSE        | 86 kDa  | 6 | 11 | 8  | 6  | 5  |
| TOP2A_MOUSE       | 173 kDa | 6 | 7  | 9  | 11 | 7  |
| MPRIP_MOUSE       | 116 kDa | 6 | 4  | 9  | 7  | 5  |
| MAP2_MOUSE        | 53 kDa  | 6 | 5  | 12 | 18 | 14 |
| D3YYI8_MOUSE (+1) | 55 kDa  | 6 | 5  | 12 | 10 | 10 |
| LAP2A_MOUSE       | 75 kDa  | 6 | 5  | 13 | 6  | 8  |
| MED1_MOUSE        | 167 kDa | 6 | 10 | 16 | 10 | 0  |
| COBA1_MOUSE       | 181 kDa | 6 | 6  | 20 | 16 | 8  |
| COPG1_MOUSE       | 98 kDa  | 7 | 9  | 0  | 1  | 0  |

|              |          |   |    |    |    |    |
|--------------|----------|---|----|----|----|----|
| MP2K3_MOUSE  | 39 kDa   | 7 | 6  | 0  | 1  | 0  |
| K2C6A_MOUSE  | 59 kDa   | 7 | 0  | 0  | 8  | 6  |
| EIF3D_MOUSE  | 64 kDa   | 7 | 7  | 1  | 1  | 2  |
| DHX29_MOUSE  | 154 kDa  | 7 | 5  | 1  | 1  | 0  |
| I20L2_MOUSE  | 41 kDa   | 7 | 5  | 1  | 3  | 2  |
| EIF3E_MOUSE  | 52 kDa   | 7 | 2  | 1  | 4  | 3  |
| HS90B_MOUSE  | 83 kDa   | 7 | 4  | 1  | 1  | 0  |
| TITIN_MOUSE  | 3906 kDa | 7 | 2  | 2  | 5  | 4  |
| RL8_MOUSE    | 28 kDa   | 7 | 11 | 2  | 7  | 7  |
| IF2A_MOUSE   | 36 kDa   | 7 | 13 | 2  | 4  | 2  |
| TEX10_MOUSE  | 105 kDa  | 7 | 3  | 2  | 1  | 1  |
| CDK1_MOUSE   | 34 kDa   | 7 | 3  | 2  | 3  | 2  |
| DIM1_MOUSE   | 35 kDa   | 7 | 11 | 3  | 2  | 4  |
| ACL6A_MOUSE  | 47 kDa   | 7 | 2  | 3  | 4  | 3  |
| COPE_MOUSE   | 35 kDa   | 7 | 5  | 3  | 2  | 1  |
| K2C1B_MOUSE  | 61 kDa   | 7 | 5  | 3  | 6  | 6  |
| G3P_MOUSE    | 36 kDa   | 7 | 4  | 4  | 3  | 3  |
| AP3B1_MOUSE  | 123 kDa  | 7 | 4  | 4  | 1  | 3  |
| K1C10_MOUSE  | 58 kDa   | 7 | 9  | 5  | 8  | 11 |
| TSP1_MOUSE   | 130 kDa  | 7 | 4  | 5  | 9  | 8  |
| EBP2_MOUSE   | 35 kDa   | 7 | 8  | 5  | 5  | 5  |
| P4HA1_MOUSE  | 61 kDa   | 7 | 10 | 5  | 5  | 1  |
| RBBP4_MOUSE  | 48 kDa   | 7 | 5  | 5  | 4  | 5  |
| RL22_MOUSE   | 15 kDa   | 7 | 5  | 6  | 7  | 4  |
| CSK21_MOUSE  | 45 kDa   | 7 | 2  | 8  | 6  | 3  |
| SMRC2_MOUSE  | 133 kDa  | 7 | 7  | 9  | 8  | 10 |
| KIF4_MOUSE   | 140 kDa  | 7 | 9  | 14 | 20 | 10 |
| RENT1_MOUSE  | 124 kDa  | 7 | 11 | 15 | 16 | 16 |
| CHERP_MOUSE  | 106 kDa  | 7 | 8  | 15 | 7  | 5  |
| TXLNA_MOUSE  | 62 kDa   | 7 | 3  | 15 | 6  | 5  |
| DDX3X_MOUSE  | 73 kDa   | 7 | 8  | 17 | 16 | 18 |
| EXOC4_MOUSE  | 111 kDa  | 7 | 6  | 17 | 13 | 13 |
| Q6P6L6_MOUSE | 120 kDa  | 7 | 8  | 18 | 15 | 11 |
| PDS5A_MOUSE  | 150 kDa  | 7 | 8  | 19 | 24 | 28 |
| CDK13_MOUSE  | 165 kDa  | 7 | 4  | 19 | 17 | 11 |
| AEBP1_MOUSE  | 128 kDa  | 8 | 4  | 0  | 0  | 1  |
| TPM4_MOUSE   | 28 kDa   | 8 | 7  | 0  | 1  | 0  |
| LTV1_MOUSE   | 54 kDa   | 8 | 5  | 0  | 0  | 0  |
| DDX55_MOUSE  | 68 kDa   | 8 | 2  | 0  | 0  | 0  |
| MK67I_MOUSE  | 36 kDa   | 8 | 8  | 1  | 1  | 0  |
| E9Q8D0_MOUSE | 62 kDa   | 8 | 9  | 1  | 0  | 2  |
| RL7_MOUSE    | 31 kDa   | 8 | 16 | 2  | 9  | 5  |
| EF1D_MOUSE   | 31 kDa   | 8 | 4  | 2  | 8  | 10 |
| RS13_MOUSE   | 17 kDa   | 8 | 9  | 3  | 2  | 1  |
| HNRPC_MOUSE  | 34 kDa   | 8 | 6  | 3  | 1  | 1  |
| Q8BK35_MOUSE | 56 kDa   | 8 | 6  | 3  | 0  | 0  |
| ACINU_MOUSE  | 151 kDa  | 8 | 12 | 4  | 1  | 3  |
| K22E_MOUSE   | 71 kDa   | 8 | 2  | 4  | 10 | 5  |



|               |         |    |    |    |     |     |
|---------------|---------|----|----|----|-----|-----|
| RLA0_MOUSE    | 34 kDa  | 8  | 5  | 5  | 7   | 5   |
| RL27_MOUSE    | 16 kDa  | 8  | 6  | 6  | 9   | 7   |
| SAFB1_MOUSE   | 105 kDa | 8  | 8  | 7  | 9   | 10  |
| MTA2_MOUSE    | 75 kDa  | 8  | 5  | 9  | 6   | 3   |
| EXOC1_MOUSE   | 102 kDa | 8  | 3  | 9  | 4   | 5   |
| D3Z0M9_MOUSE  | 95 kDa  | 8  | 11 | 11 | 8   | 8   |
| DDX20_MOUSE   | 92 kDa  | 8  | 9  | 15 | 15  | 13  |
| RADI_MOUSE    | 69 kDa  | 8  | 11 | 17 | 18  | 11  |
| E9PWQ3_MOUSE  | 354 kDa | 9  | 13 | 0  | 37  | 54  |
| RPA49_MOUSE   | 54 kDa  | 9  | 6  | 0  | 5   | 5   |
| LLPH_MOUSE    | 15 kDa  | 9  | 7  | 0  | 0   | 2   |
| NOC3L_MOUSE   | 93 kDa  | 9  | 7  | 0  | 0   | 0   |
| EIF3G_MOUSE   | 36 kDa  | 9  | 7  | 2  | 3   | 3   |
| IF4A3_MOUSE   | 47 kDa  | 9  | 7  | 2  | 2   | 1   |
| K2C5_MOUSE    | 62 kDa  | 9  | 6  | 3  | 12  | 11  |
| CC137_MOUSE   | 33 kDa  | 9  | 7  | 3  | 4   | 3   |
| BAF_MOUSE     | 10 kDa  | 9  | 3  | 3  | 8   | 3   |
| RL32_MOUSE    | 16 kDa  | 9  | 11 | 4  | 6   | 2   |
| RL21_MOUSE    | 19 kDa  | 9  | 9  | 4  | 4   | 5   |
| RPN1_MOUSE    | 69 kDa  | 9  | 4  | 4  | 2   | 1   |
| EI2BD_MOUSE   | 58 kDa  | 9  | 6  | 5  | 4   | 5   |
| RL37A_MOUSE   | 10 kDa  | 9  | 13 | 6  | 6   | 7   |
| RPA34_MOUSE   | 43 kDa  | 9  | 11 | 6  | 3   | 4   |
| NOP58_MOUSE   | 60 kDa  | 9  | 6  | 7  | 9   | 10  |
| MCA3_MOUSE    | 20 kDa  | 9  | 10 | 10 | 14  | 13  |
| CTCF_MOUSE    | 84 kDa  | 9  | 8  | 12 | 12  | 9   |
| MIC60_MOUSE   | 84 kDa  | 9  | 10 | 12 | 8   | 9   |
| ZC3HF_MOUSE   | 48 kDa  | 9  | 8  | 16 | 19  | 19  |
| B1AR17_MOUSE  | 233 kDa | 9  | 6  | 20 | 13  | 16  |
| RAI14_MOUSE   | 109 kDa | 9  | 11 | 24 | 7   | 11  |
| CCAR1_MOUSE   | 132 kDa | 9  | 10 | 34 | 42  | 35  |
| PDS5B_MOUSE   | 164 kDa | 9  | 14 | 60 | 42  | 33  |
| MRRP1_MOUSE   | 48 kDa  | 10 | 8  | 0  | 0   | 2   |
| TCPG_MOUSE    | 61 kDa  | 10 | 3  | 0  | 2   | 1   |
| SEC62_MOUSE   | 46 kDa  | 10 | 7  | 1  | 6   | 8   |
| CK098_MOUSE   | 14 kDa  | 10 | 8  | 1  | 4   | 3   |
| NAT10_MOUSE   | 115 kDa | 10 | 4  | 1  | 1   | 2   |
| MCCA_MOUSE    | 79 kDa  | 10 | 8  | 3  | 0   | 1   |
| RS27A_MOUSE   | 18 kDa  | 10 | 8  | 5  | 7   | 8   |
| EIF3B_MOUSE   | 91 kDa  | 10 | 7  | 5  | 3   | 5   |
| H31_MOUSE(+1) | 15 kDa  | 10 | 12 | 6  | 5   | 6   |
| PLRG1_MOUSE   | 57 kDa  | 10 | 13 | 7  | 8   | 4   |
| E9Q616_MOUSE  | 604 kDa | 10 | 6  | 9  | 21  | 25  |
| EXOSX_MOUSE   | 101 kDa | 10 | 4  | 12 | 6   | 3   |
| LARP7_MOUSE   | 65 kDa  | 10 | 11 | 16 | 13  | 10  |
| CO1A1_MOUSE   | 138 kDa | 10 | 11 | 19 | 25  | 24  |
| NUCL_MOUSE    | 77 kDa  | 10 | 41 | 20 | 227 | 131 |
| SYVC_MOUSE    | 140 kDa | 10 | 10 | 22 | 15  | 9   |

|              |         |    |    |    |    |    |
|--------------|---------|----|----|----|----|----|
| CCD47_MOUSE  | 56 kDa  | 11 | 4  | 1  | 0  | 2  |
| RRP1B_MOUSE  | 81 kDa  | 11 | 9  | 4  | 3  | 2  |
| MYL9_MOUSE   | 20 kDa  | 11 | 4  | 4  | 0  | 0  |
| RS23_MOUSE   | 16 kDa  | 11 | 10 | 7  | 8  | 6  |
| SNUT2_MOUSE  | 65 kDa  | 11 | 6  | 10 | 11 | 8  |
| PSMD3_MOUSE  | 61 kDa  | 11 | 6  | 10 | 2  | 2  |
| AP2M1_MOUSE  | 50 kDa  | 11 | 12 | 12 | 20 | 14 |
| LRC59_MOUSE  | 35 kDa  | 11 | 8  | 14 | 12 | 9  |
| ADT2_MOUSE   | 33 kDa  | 11 | 15 | 15 | 18 | 22 |
| MA7D1_MOUSE  | 93 kDa  | 11 | 13 | 15 | 12 | 13 |
| FLNA_MOUSE   | 281 kDa | 11 | 9  | 15 | 11 | 12 |
| ADT1_MOUSE   | 33 kDa  | 11 | 13 | 16 | 17 | 20 |
| UTP20_MOUSE  | 318 kDa | 11 | 6  | 19 | 13 | 10 |
| DDX5_MOUSE   | 69 kDa  | 11 | 11 | 26 | 24 | 18 |
| THOC2_MOUSE  | 183 kDa | 12 | 12 | 0  | 0  | 0  |
| H2AY_MOUSE   | 40 kDa  | 12 | 9  | 0  | 0  | 0  |
| DDX54_MOUSE  | 98 kDa  | 12 | 7  | 0  | 0  | 0  |
| THIL_MOUSE   | 45 kDa  | 12 | 5  | 1  | 1  | 3  |
| ATPB_MOUSE   | 56 kDa  | 12 | 11 | 2  | 1  | 0  |
| RL6_MOUSE    | 34 kDa  | 12 | 16 | 6  | 11 | 9  |
| RL35_MOUSE   | 15 kDa  | 12 | 12 | 7  | 4  | 8  |
| RBM39_MOUSE  | 59 kDa  | 12 | 14 | 9  | 6  | 6  |
| RL4_MOUSE    | 47 kDa  | 12 | 19 | 10 | 15 | 13 |
| DKC1_MOUSE   | 57 kDa  | 12 | 17 | 11 | 10 | 5  |
| RS14_MOUSE   | 16 kDa  | 12 | 19 | 12 | 13 | 12 |
| YBOX1_MOUSE  | 36 kDa  | 12 | 41 | 14 | 50 | 35 |
| F8VQ29_MOUSE | 185 kDa | 12 | 14 | 14 | 10 | 9  |
| D4AFX7_MOUSE | 255 kDa | 12 | 7  | 15 | 14 | 15 |
| Q3UJB0_MOUSE | 98 kDa  | 12 | 15 | 16 | 19 | 13 |
| PUF60_MOUSE  | 60 kDa  | 12 | 18 | 19 | 27 | 18 |
| ANR17_MOUSE  | 274 kDa | 12 | 10 | 21 | 15 | 16 |
| ARHG2_MOUSE  | 112 kDa | 12 | 11 | 23 | 25 | 15 |
| CO5A1_MOUSE  | 184 kDa | 12 | 11 | 26 | 18 | 18 |
| NOG1_MOUSE   | 74 kDa  | 13 | 14 | 0  | 1  | 2  |
| H11_MOUSE    | 22 kDa  | 13 | 16 | 3  | 6  | 3  |
| NOP16_MOUSE  | 21 kDa  | 13 | 12 | 5  | 6  | 3  |
| SNR40_MOUSE  | 39 kDa  | 13 | 8  | 6  | 10 | 8  |
| EIF3C_MOUSE  | 106 kDa | 13 | 7  | 6  | 4  | 5  |
| RS26_MOUSE   | 13 kDa  | 13 | 14 | 7  | 11 | 13 |
| SYYC_MOUSE   | 59 kDa  | 13 | 6  | 7  | 4  | 1  |
| SEP11_MOUSE  | 50 kDa  | 13 | 9  | 10 | 20 | 18 |
| SYTL4_MOUSE  | 76 kDa  | 13 | 6  | 10 | 4  | 7  |
| SMCA5_MOUSE  | 122 kDa | 13 | 13 | 13 | 10 | 5  |
| SMRC1_MOUSE  | 123 kDa | 13 | 9  | 14 | 18 | 11 |
| DDX50_MOUSE  | 82 kDa  | 13 | 14 | 14 | 11 | 12 |
| SNUT1_MOUSE  | 91 kDa  | 13 | 15 | 17 | 27 | 19 |
| AIMP2_MOUSE  | 35 kDa  | 13 | 18 | 21 | 21 | 16 |
| NOL6_MOUSE   | 129 kDa | 14 | 9  | 0  | 0  | 2  |

|              |         |    |    |    |    |    |
|--------------|---------|----|----|----|----|----|
| H2AV_MOUSE   | 14 kDa  | 14 | 11 | 0  | 1  | 0  |
| LMNA_MOUSE   | 74 kDa  | 14 | 13 | 1  | 0  | 2  |
| RS24_MOUSE   | 15 kDa  | 14 | 17 | 4  | 7  | 6  |
| RL9_MOUSE    | 22 kDa  | 14 | 14 | 4  | 4  | 3  |
| RL27A_MOUSE  | 17 kDa  | 14 | 12 | 7  | 5  | 7  |
| FARP1_MOUSE  | 119 kDa | 14 | 8  | 8  | 10 | 13 |
| PRPF3_MOUSE  | 77 kDa  | 14 | 9  | 8  | 8  | 6  |
| DRG1_MOUSE   | 41 kDa  | 14 | 14 | 11 | 18 | 21 |
| SLTM_MOUSE   | 117 kDa | 14 | 15 | 25 | 24 | 20 |
| E9Q7G0_MOUSE | 236 kDa | 15 | 18 | 1  | 3  | 5  |
| Q80ZM5_MOUSE | 20 kDa  | 15 | 15 | 1  | 3  | 2  |
| F6YVP7_MOUSE | 18 kDa  | 15 | 16 | 2  | 2  | 2  |
| RL36A_MOUSE  | 12 kDa  | 15 | 9  | 2  | 6  | 3  |
| RS15A_MOUSE  | 15 kDa  | 15 | 7  | 2  | 5  | 1  |
| HNRPF_MOUSE  | 46 kDa  | 15 | 15 | 5  | 8  | 5  |
| IF4G1_MOUSE  | 176 kDa | 15 | 18 | 6  | 8  | 9  |
| LRRF1_MOUSE  | 79 kDa  | 15 | 6  | 7  | 3  | 8  |
| ECHA_MOUSE   | 83 kDa  | 15 | 9  | 8  | 3  | 6  |
| NOP56_MOUSE  | 64 kDa  | 15 | 13 | 10 | 8  | 6  |
| GRP78_MOUSE  | 72 kDa  | 15 | 16 | 13 | 12 | 12 |
| ABCF2_MOUSE  | 72 kDa  | 15 | 13 | 20 | 21 | 19 |
| PYRG1_MOUSE  | 67 kDa  | 16 | 14 | 0  | 0  | 0  |
| ABCF1_MOUSE  | 95 kDa  | 16 | 12 | 6  | 1  | 4  |
| RBM25_MOUSE  | 100 kDa | 16 | 20 | 7  | 7  | 7  |
| D3Z2H9_MOUSE | 29 kDa  | 16 | 14 | 7  | 4  | 0  |
| IF2G_MOUSE   | 51 kDa  | 16 | 25 | 8  | 11 | 6  |
| RL24_MOUSE   | 18 kDa  | 16 | 16 | 10 | 15 | 11 |
| SUN2_MOUSE   | 82 kDa  | 16 | 11 | 10 | 9  | 7  |
| Q6ZWQ9_MOUSE | 20 kDa  | 16 | 11 | 10 | 6  | 3  |
| H15_MOUSE    | 23 kDa  | 16 | 16 | 10 | 7  | 9  |
| RL19_MOUSE   | 23 kDa  | 16 | 18 | 12 | 11 | 10 |
| PABP1_MOUSE  | 71 kDa  | 16 | 16 | 18 | 13 | 12 |
| Q8K205_MOUSE | 117 kDa | 16 | 17 | 22 | 17 | 20 |
| AP3D1_MOUSE  | 135 kDa | 17 | 14 | 7  | 3  | 5  |
| TPM2_MOUSE   | 33 kDa  | 17 | 13 | 9  | 4  | 0  |
| CDC5L_MOUSE  | 92 kDa  | 17 | 21 | 13 | 13 | 11 |
| SEPT7_MOUSE  | 51 kDa  | 17 | 11 | 15 | 25 | 24 |
| SMCA4_MOUSE  | 181 kDa | 17 | 13 | 19 | 15 | 11 |
| HNRPU_MOUSE  | 88 kDa  | 17 | 20 | 26 | 24 | 21 |
| CKAP5_MOUSE  | 226 kDa | 17 | 9  | 29 | 16 | 9  |
| SF3B1_MOUSE  | 146 kDa | 17 | 42 | 39 | 35 | 37 |
| SON_MOUSE    | 266 kDa | 18 | 12 | 1  | 0  | 0  |
| PR40A_MOUSE  | 108 kDa | 18 | 16 | 3  | 2  | 5  |
| RL5_MOUSE    | 34 kDa  | 18 | 25 | 4  | 6  | 6  |
| RL7A_MOUSE   | 30 kDa  | 18 | 13 | 5  | 7  | 7  |
| E9PWG6_MOUSE | 113 kDa | 18 | 21 | 10 | 5  | 5  |
| ASPH_MOUSE   | 83 kDa  | 18 | 10 | 11 | 12 | 11 |
| DHX15_MOUSE  | 91 kDa  | 18 | 30 | 13 | 20 | 13 |

|              |         |    |    |    |    |    |
|--------------|---------|----|----|----|----|----|
| SDPR_MOUSE   | 47 kDa  | 18 | 21 | 43 | 46 | 45 |
| DDX18_MOUSE  | 74 kDa  | 19 | 19 | 2  | 3  | 5  |
| RL28_MOUSE   | 16 kDa  | 19 | 25 | 4  | 8  | 4  |
| RL29_MOUSE   | 18 kDa  | 19 | 25 | 10 | 9  | 5  |
| EIF3A_MOUSE  | 162 kDa | 19 | 15 | 13 | 10 | 15 |
| IF2B_MOUSE   | 38 kDa  | 19 | 23 | 13 | 15 | 10 |
| PRP6_MOUSE   | 107 kDa | 19 | 21 | 20 | 17 | 21 |
| MOES_MOUSE   | 68 kDa  | 19 | 15 | 41 | 33 | 22 |
| RS15_MOUSE   | 17 kDa  | 20 | 21 | 6  | 7  | 8  |
| RS25_MOUSE   | 14 kDa  | 20 | 18 | 9  | 7  | 10 |
| AP1B1_MOUSE  | 104 kDa | 20 | 18 | 14 | 16 | 17 |
| PRP19_MOUSE  | 55 kDa  | 20 | 29 | 21 | 15 | 14 |
| F8VQC1_MOUSE | 75 kDa  | 20 | 16 | 26 | 28 | 26 |
| H14_MOUSE    | 22 kDa  | 21 | 23 | 0  | 12 | 10 |
| ATPA_MOUSE   | 60 kDa  | 21 | 15 | 1  | 0  | 0  |
| RL31_MOUSE   | 14 kDa  | 21 | 22 | 5  | 11 | 7  |
| H2AX_MOUSE   | 15 kDa  | 21 | 28 | 6  | 1  | 5  |
| COPA_MOUSE   | 138 kDa | 21 | 14 | 9  | 12 | 8  |
| NPM_MOUSE    | 33 kDa  | 21 | 23 | 14 | 22 | 23 |
| GEMI5_MOUSE  | 167 kDa | 21 | 14 | 23 | 27 | 21 |
| NEMF_MOUSE   | 121 kDa | 22 | 30 | 7  | 4  | 3  |
| H12_MOUSE    | 21 kDa  | 22 | 29 | 13 | 18 | 12 |
| RS2_MOUSE    | 31 kDa  | 22 | 29 | 13 | 9  | 10 |
| RRP12_MOUSE  | 143 kDa | 22 | 17 | 13 | 14 | 8  |
| DDX27_MOUSE  | 86 kDa  | 23 | 33 | 7  | 5  | 6  |
| MYO1C_MOUSE  | 122 kDa | 23 | 20 | 23 | 10 | 5  |
| NOP2_MOUSE   | 87 kDa  | 24 | 16 | 9  | 15 | 8  |
| H4_MOUSE     | 11 kDa  | 24 | 27 | 10 | 5  | 6  |
| TPM1_MOUSE   | 33 kDa  | 24 | 15 | 20 | 7  | 9  |
| RS11_MOUSE   | 18 kDa  | 25 | 31 | 6  | 13 | 8  |
| RL10_MOUSE   | 25 kDa  | 25 | 21 | 9  | 13 | 11 |
| RS17_MOUSE   | 16 kDa  | 25 | 20 | 11 | 13 | 8  |
| SRPK1_MOUSE  | 73 kDa  | 25 | 29 | 14 | 13 | 15 |
| SRRM2_MOUSE  | 295 kDa | 26 | 24 | 1  | 0  | 0  |
| RS16_MOUSE   | 16 kDa  | 26 | 20 | 6  | 7  | 7  |
| RS3_MOUSE    | 27 kDa  | 27 | 29 | 3  | 2  | 2  |
| RL13_MOUSE   | 24 kDa  | 27 | 28 | 13 | 10 | 10 |
| U5S1_MOUSE   | 109 kDa | 27 | 28 | 24 | 24 | 15 |
| Q8BML9_MOUSE | 88 kDa  | 27 | 32 | 48 | 42 | 28 |
| Q8CGP4_MOUSE | 14 kDa  | 28 | 31 | 9  | 4  | 7  |
| LYRIC_MOUSE  | 64 kDa  | 28 | 34 | 16 | 25 | 24 |
| RL23_MOUSE   | 15 kDa  | 28 | 26 | 16 | 18 | 17 |
| RS7_MOUSE    | 22 kDa  | 28 | 32 | 21 | 19 | 13 |
| RS8_MOUSE    | 24 kDa  | 30 | 24 | 11 | 9  | 9  |
| H2B2B_MOUSE  | 14 kDa  | 30 | 37 | 17 | 10 | 10 |
| TSR1_MOUSE   | 92 kDa  | 31 | 31 | 11 | 8  | 12 |
| HNRPM_MOUSE  | 78 kDa  | 31 | 38 | 17 | 23 | 14 |
| HSP7C_MOUSE  | 71 kDa  | 31 | 29 | 21 | 20 | 13 |

|                  |         |    |    |     |     |    |
|------------------|---------|----|----|-----|-----|----|
| AIMP1_MOUSE      | 34 kDa  | 31 | 38 | 32  | 45  | 43 |
| TBB6_MOUSE       | 50 kDa  | 32 | 38 | 15  | 9   | 9  |
| LYAR_MOUSE       | 44 kDa  | 33 | 30 | 19  | 32  | 30 |
| SPB1_MOUSE       | 96 kDa  | 34 | 20 | 2   | 5   | 4  |
| RL23A_MOUSE (+1) | 18 kDa  | 34 | 41 | 14  | 13  | 12 |
| RS6_MOUSE        | 29 kDa  | 34 | 44 | 23  | 16  | 19 |
| U520_MOUSE       | 245 kDa | 37 | 14 | 20  | 18  | 27 |
| PRP8_MOUSE       | 274 kDa | 37 | 17 | 21  | 17  | 19 |
| SYMC_MOUSE       | 101 kDa | 37 | 37 | 48  | 43  | 45 |
| PTRF_MOUSE       | 44 kDa  | 37 | 31 | 59  | 66  | 53 |
| HP1B3_MOUSE      | 61 kDa  | 39 | 29 | 3   | 1   | 3  |
| CND1_MOUSE       | 156 kDa | 39 | 31 | 11  | 13  | 13 |
| SYRC_MOUSE       | 76 kDa  | 40 | 45 | 58  | 57  | 41 |
| RL26_MOUSE       | 17 kDa  | 41 | 42 | 12  | 14  | 12 |
| MYL6_MOUSE       | 17 kDa  | 42 | 24 | 12  | 12  | 9  |
| RS9_MOUSE        | 23 kDa  | 42 | 46 | 20  | 25  | 23 |
| SMC4_MOUSE       | 147 kDa | 42 | 42 | 22  | 26  | 35 |
| E41L2_MOUSE      | 110 kDa | 42 | 39 | 40  | 28  | 26 |
| CHD4_MOUSE       | 218 kDa | 42 | 32 | 43  | 25  | 26 |
| MAP4_MOUSE       | 117 kDa | 42 | 39 | 60  | 45  | 41 |
| AP2A1_MOUSE      | 108 kDa | 43 | 48 | 31  | 29  | 29 |
| EF1A1_MOUSE      | 50 kDa  | 46 | 42 | 15  | 21  | 21 |
| SMC2_MOUSE       | 134 kDa | 46 | 41 | 33  | 37  | 33 |
| IQGA1_MOUSE      | 189 kDa | 46 | 41 | 38  | 29  | 30 |
| SYK_MOUSE        | 68 kDa  | 46 | 48 | 57  | 65  | 55 |
| FINC_MOUSE       | 273 kDa | 48 | 52 | 26  | 30  | 27 |
| GNL3_MOUSE       | 61 kDa  | 49 | 59 | 34  | 32  | 33 |
| RS4X_MOUSE       | 30 kDa  | 51 | 65 | 13  | 23  | 18 |
| AP2A2_MOUSE      | 104 kDa | 52 | 48 | 29  | 38  | 33 |
| TBB2A_MOUSE (+1) | 50 kDa  | 53 | 60 | 0   | 0   | 0  |
| TBA1A_MOUSE      | 50 kDa  | 54 | 45 | 0   | 0   | 0  |
| SYDC_MOUSE       | 57 kDa  | 54 | 46 | 53  | 63  | 49 |
| SYLC_MOUSE       | 134 kDa | 54 | 56 | 66  | 58  | 46 |
| AP2B1_MOUSE      | 105 kDa | 55 | 52 | 45  | 37  | 42 |
| CKAP4_MOUSE      | 64 kDa  | 55 | 55 | 77  | 68  | 70 |
| ACTA_MOUSE       | 42 kDa  | 56 | 58 | 64  | 65  | 50 |
| ACACA_MOUSE      | 265 kDa | 57 | 22 | 10  | 5   | 7  |
| TBA1B_MOUSE      | 50 kDa  | 57 | 47 | 25  | 16  | 16 |
| RL17_MOUSE       | 21 kDa  | 57 | 53 | 28  | 29  | 23 |
| RL3_MOUSE        | 46 kDa  | 59 | 73 | 11  | 17  | 16 |
| RL1D1_MOUSE      | 50 kDa  | 60 | 45 | 21  | 22  | 18 |
| TBB4B_MOUSE      | 50 kDa  | 60 | 69 | 21  | 17  | 15 |
| TBB5_MOUSE       | 50 kDa  | 66 | 77 | 26  | 22  | 19 |
| DDX21_MOUSE      | 94 kDa  | 71 | 89 | 67  | 50  | 53 |
| ACTB_MOUSE       | 42 kDa  | 76 | 74 | 96  | 78  | 68 |
| ACTG_MOUSE       | 42 kDa  | 77 | 72 | 93  | 78  | 65 |
| KTN1_MOUSE       | 153 kDa | 79 | 85 | 107 | 88  | 72 |
| SYIC_MOUSE       | 144 kDa | 94 | 83 | 106 | 104 | 98 |

|             |         |     |     |     |     |     |
|-------------|---------|-----|-----|-----|-----|-----|
| MBB1A_MOUSE | 152 kDa | 96  | 99  | 66  | 78  | 70  |
| RS3A_MOUSE  | 30 kDa  | 98  | 145 | 59  | 32  | 42  |
| MYH10_MOUSE | 229 kDa | 101 | 63  | 122 | 42  | 28  |
| MAP1B_MOUSE | 270 kDa | 102 | 60  | 12  | 10  | 8   |
| E41L3_MOUSE | 103 kDa | 104 | 78  | 53  | 52  | 48  |
| SYEP_MOUSE  | 170 kDa | 105 | 125 | 141 | 140 | 111 |
| RRBP1_MOUSE | 173 kDa | 125 | 124 | 139 | 125 | 129 |
| PLEC_MOUSE  | 534 kDa | 127 | 60  | 34  | 38  | 32  |
| VIME_MOUSE  | 54 kDa  | 145 | 148 | 22  | 10  | 7   |
| MYH9_MOUSE  | 226 kDa | 464 | 338 | 372 | 173 | 140 |
